# Supplementary material
Source: MDPI journal article supplement (https://www.mdpi.com/2073-4441/13/24/3515)
Supplement: s1 [file s1]

# Treatment of Textile Wastewater Using Advanced Oxidation Processes—A Critical Review

## Supplementary Information

Yiqing Zhang <sup>1</sup>, Kashif Shaad <sup>1,\*</sup>, Derek Vollmer <sup>1</sup> and Chi Ma <sup>2</sup>

<sup>1</sup> Moore Center for Science, Conservation International, Arlington, VA 22202, USA; yizhang@conservation.org (Y.Z.); dvollmer@conservation.org (D.V.)

<sup>2</sup> Sateri, Jiujiang City, Jiangxi 332017, China; chi\_ma@sateri.com.cn

\* Correspondence: kshaad@conservation.org

**Table S1** Oxidation potential of various oxidizing agents.

**Table S2** Textile wastewater treatment using O<sub>3</sub>-based AOPs.

**Table S3** Textile wastewater treatment using photochemical AOPs.

**Table S4** Textile wastewater treatment using photocatalytic AOPs.

**Table S5** Textile wastewater treatment using Fenton-based AOPs.

**Table S6** Textile wastewater treatment using electrochemical AOPs.

**Table S7** Textile wastewater treatment using US-based AOPs.

**Table S1** Oxidation potential of various oxidizing agents.

| Oxidizing agents              | Oxidation potential (E <sub>0</sub> , V) |
|-------------------------------|------------------------------------------|
| F <sub>2</sub>                | 3.06                                     |
| HO•                           | 2.15-2.8                                 |
| SO <sub>4</sub> •-            | 2.5-3.1                                  |
| O <sub>3</sub>                | 2.08                                     |
| H <sub>2</sub> O <sub>2</sub> | 1.78                                     |
| ClO•                          | 1.49                                     |
| Cl <sub>2</sub>               | 1.36                                     |
| ClO <sub>2</sub>              | 1.27                                     |
| HO <sub>2</sub> •             | 0.79                                     |

**Table S2** Textile wastewater treatment using O<sub>3</sub>-based AOPs.

| Process        | Dye                                         | Experimental conditions                                               | Removal                     | EEO (kWh m <sup>-3</sup> order <sup>-1</sup> ) | References                   |
|----------------|---------------------------------------------|-----------------------------------------------------------------------|-----------------------------|------------------------------------------------|------------------------------|
| O <sub>3</sub> | Raw textile wastewater                      | [O <sub>3</sub> ]=2340 mg/L, [TOC]=336 mg/L, [COD]=1476 mg/L, pH=10.7 | Color:99%, COD:18%, TOC:17% | 43.61                                          | (Alaton and Balcioglu, 2002) |
| O <sub>3</sub> | Biotreated textile wastewater               | [O <sub>3</sub> ]=2340 mg/L, [TOC]=58 mg/L, [COD]=325 mg/L, pH=7.7    | COD:54%                     | 8.31                                           | (Alaton and Balcioglu, 2002) |
| O <sub>3</sub> | Six reactive dyestuffs                      | [O <sub>3</sub> ]=1.65 mg/L, [DOC]=25/50 mg/L, pH=11.5                | TOC:10.4-13.6%              | 0.23, 0.217                                    | (Arslan et al., 1999)        |
| O <sub>3</sub> | Mixture reactive dyes                       | [O <sub>3</sub> ]=1310 mg/L, [TOC]=46.8 mg/L, pH=7.0                  | TOC:40.5%                   | 0.633                                          | (Arslan et al., 2002)        |
| O <sub>3</sub> | Acetate and polyester fiber dyeing effluent | [O <sub>3</sub> ]=2 g/h, [COD]=930 mg/L, pH=9                         | Color:90%, COD:92%          | 69.02                                          | (Azbar et al., 2004)         |
| O <sub>3</sub> | Biologically treated textile wastewater     | [O <sub>3</sub> ]=58 mg/L, [COD]=450 mg/L, pH=8.3                     | Color:98-99%                |                                                | (Baban et al., 2003)         |
| O <sub>3</sub> | Real textile wastewater                     | [O <sub>3</sub> ]=2.91 L/min, [COD]=153 mg/L, pH=3/8                  | Color:91.5%                 | 2.43, 3.34                                     | (Cardoso et al., 2016)       |
| O <sub>3</sub> | Reactive Black 5                            | [O <sub>3</sub> ]=132 mg/L, [dye]=230 mg/L, pH=2.0                    | Color:100%, TOC:80%         |                                                | (Chu et al., 2007)           |

|                                                |                          |                                                                                                   |                                                  |                     |                                |
|------------------------------------------------|--------------------------|---------------------------------------------------------------------------------------------------|--------------------------------------------------|---------------------|--------------------------------|
| O <sub>3</sub>                                 | Textile effluent (Color) | pH=5/7/9                                                                                          | Color:100%%                                      | 38.0, 19.5          | (Durr-E-Shahwar et al., 2012)  |
| O <sub>3</sub>                                 | Textile effluent (COD)   | pH=5/7/9                                                                                          | COD:87-100%                                      | 38.0, 33.4          | (Durr-E-Shahwar et al., 2012)  |
| O <sub>3</sub>                                 | Acid Red 151             | [O <sub>3</sub> ]=2.208 g/h, [dye]=200 mg/L, pH=2.5/7/13                                          | Color:98-99.7%, COD:40.7-46.3%                   |                     | (Erol and Özbelge, 2008)       |
| O <sub>3</sub>                                 | Remazol Brilliant Blue R | [O <sub>3</sub> ]=2.208 g/h, [dye]=200 mg/L, pH=2.5/7/13                                          | Color:99.3-99.5%, COD:44.8-67.7%                 |                     | (Erol and Özbelge, 2008)       |
| O <sub>3</sub>                                 | Congo Red                | [O <sub>3</sub> ]=0.5 L/min, [dye]=500 mg/L, pH=12                                                | COD:85%, TOC:81%                                 |                     | (Faouzi Elahmadi et al., 2009) |
| O <sub>3</sub>                                 | Acid Red 14              | [O <sub>3</sub> ]=19.2 g/h, [dye]=200 mg/L, pH=2-12                                               | Color:98%, COD:45%                               |                     | (Gao et al., 2012)             |
| O <sub>3</sub>                                 | Reactive red 198         | [O <sub>3</sub> ]=0.25 g/h, pH=6-10                                                               | Color:>80%                                       |                     | (Karami et al., 2016)          |
| O <sub>3</sub>                                 | Congo Red                | [O <sub>3</sub> ]=2.7 g/h, [dye]=300 mg/L, pH=8.5                                                 | Color:>99%                                       |                     | (Khadhraoui et al., 2009)      |
| O <sub>3</sub>                                 | Acid Red 88              | [O <sub>3</sub> ]=2 g/h, [dye]=0.5 mM, pH=3-11                                                    | Color:98.2%, COD:64%                             |                     | (Muthukumar et al., 2004)      |
| O <sub>3</sub>                                 | Reactive Black 19        | [O <sub>3</sub> ]=55g/m <sup>3</sup> , [dye]=200 mg/L, pH=7                                       | Color:100%, COD:55%, TOC:17%                     |                     | (Tehrani-Bagha et al., 2010)   |
| O <sub>3</sub>                                 | Dye bath effluent        | [O <sub>3</sub> ]=11-111 mg/L min, [dye]=2480 mg/L, pH=4.7                                        | Color:60-91%                                     |                     | (Sevimli and Sarikaya, 2005)   |
| O <sub>3</sub>                                 | Plant effluent           | [O <sub>3</sub> ]=11-111 mg/L min, [dye]=665 mg/L, pH=6.7                                         | Color:74%                                        |                     | (Sevimli and Sarikaya, 2005)   |
| O <sub>3</sub>                                 | Reactive Blue 15         | [O <sub>3</sub> ]=0.52 L/min, [dye]=1 g/L                                                         | COD:51.7%-84.6%                                  |                     | (J. Wu et al., 2008)           |
| O <sub>3</sub>                                 | C.I. Reactive Red 2      | [O <sub>3</sub> ]=500 mL/min, [dye]=40 mg/L, pH=4/7/10                                            |                                                  | 3.684, 2.111, 1.07  | (Wu and Ng, 2008)              |
| O <sub>3</sub>                                 | C.I. Reactive Red 2      | [O <sub>3</sub> ]=500 mL/min, [dye]=20/40 mg/L, pH=7                                              |                                                  | 2.19, 3.55          | (Wu et al., 2013)              |
| O <sub>3</sub>                                 | Textile effluent         | [O <sub>3</sub> ]=2 g/h, [COD]=172 mg/L, pH=9                                                     | Color:97%, COD:81%                               | 29.27               | (Yonar et al., 2005)           |
| O <sub>3</sub> /H <sub>2</sub> O <sub>2</sub>  | Six reactive dyestuffs   | [O <sub>3</sub> ]=1.65 mg/L, [H <sub>2</sub> O <sub>2</sub> ]=1 mM, [DOC]=25 mg/L, pH=7.5         | TOC: 11.1%                                       | 0.479               | (Arslan et al., 1999)          |
| O <sub>3</sub> /H <sub>2</sub> O <sub>2</sub>  | Six reactive dyestuffs   | [O <sub>3</sub> ]=1.65 mg/L, [H <sub>2</sub> O <sub>2</sub> ]=1 mM, DOC=50 mg/L, pH=7.5           | TOC: 5.0%                                        | 0.721               | (Arslan et al., 1999)          |
| O <sub>3</sub> /H <sub>2</sub> O <sub>2</sub>  | Reactive Red 198         | [O <sub>3</sub> ]=0.25 g/h, [H <sub>2</sub> O <sub>2</sub> ]=0.03 mol/L, [dye]=200 mg/L, pH=6-10  | Color:100%, COD:55%                              |                     | (Karami et al., 2016)          |
| O <sub>3</sub> /H <sub>2</sub> O <sub>2</sub>  | Congo Red                | [O <sub>3</sub> ]=2.7 g/h, [H <sub>2</sub> O <sub>2</sub> ]=7.5 mM/L, [dye]=0.3 g/L, pH=8.7       | Color:> 90%                                      |                     | (Khadhraoui et al., 2009)      |
| O <sub>3</sub> /H <sub>2</sub> O <sub>2</sub>  | C.I. Reactive Red 2      | [O <sub>3</sub> ]=500 mL/min, [H <sub>2</sub> O <sub>2</sub> ]=1000 mg/L [dye]=40 mg/L, pH=4/7/10 | Color: 98-99%                                    | 9.225, 4.321, 3.568 | (Wu and Ng, 2008)              |
| O <sub>3</sub> /Al <sub>2</sub> O <sub>3</sub> | Acid Red 151             | [O <sub>3</sub> ]=2.208 g/h, [dye]=200 mg/L, pH=2.5/7/13                                          | Color:94.9-98.4%, COD:50.5-78.7%                 |                     | (Erol and Özbelge, 2008)       |
| O <sub>3</sub> /Al <sub>2</sub> O <sub>3</sub> | Remazol Brilliant Blue R | [O <sub>3</sub> ]=2.208 g/h, [dye]=200 mg/L, pH=2.5/7/13                                          | Color:97.5-98.3%, COD:42.5-82.6%                 |                     | (Erol and Özbelge, 2008)       |
| O <sub>3</sub> /PFOA                           | Acid Red 151             | [O <sub>3</sub> ]=2.208 g/h, [dye]=200 mg/L, pH=2.5/7/13                                          | Color: 94.8-98.8%, TOC:53.0-75.7%                |                     | (Erol and Özbelge, 2008)       |
| O <sub>3</sub> /PFOA                           | Remazol Brilliant Blue R | [O <sub>3</sub> ]=2.208 g/h, [dye]=200 mg/L, pH=2.5/7/13                                          | Color:97.4-99.4%, TOC:56.6-96.6%                 |                     | (Erol and Özbelge, 2008)       |
| O <sub>3</sub> /Fe <sup>2+</sup>               | Raw textile dye effluent | [O <sub>3</sub> ]=0.05-0.2 g/h, [Fe <sup>2+</sup> ]=1-6 g/L, COD=838 mg/L, pH=6.5                 | Color:50-70%                                     |                     | (Malik et al., 2018)           |
| O <sub>3</sub> /Fe <sup>2+</sup>               | C.I. Reactive Red 2      | [O <sub>3</sub> ]=50 mg/L, [Fe <sup>2+</sup> ]=0.9 mM, [dye]=0.45 mM, pH=7                        | Color:95%                                        |                     | (X. Zhang et al., 2013)        |
| O <sub>3</sub> /Fe <sup>3+</sup>               | C.I. Reactive Red 2      | [O <sub>3</sub> ]=500 mL/min, [Fe <sup>3+</sup> ]=25 mg/L, [dye]=40 mg/L, pH=4/7/10               |                                                  | 2.473, 2.541, 1.332 | (Wu and Ng, 2008)              |
| O <sub>3</sub> /nZVI                           | Raw textile dye effluent | [O <sub>3</sub> ]=0.05-0.2 g/h, [nZVI]=1-6 g/L, [COD]=838 mg/L, pH=6.5                            | Color:50-85%                                     |                     | (Malik et al., 2018)           |
| O <sub>3</sub> /Mn <sup>2+</sup>               | C.I. Reactive Red 2      | [dye]=100 mg/L, [O <sub>3</sub> ]=0.1 mg/L, [Mn <sup>2+</sup> ]=0.1 g/L, pH=2                     | Color: >95%                                      |                     | (C. H. Wu et al., 2008)        |
| O <sub>3</sub> /MnO <sub>2</sub>               | C.I. Reactive Red 2      | [dye]=100 mg/L, [O <sub>3</sub> ]=0.8 mg/L, [MnO <sub>2</sub> ]=0.8 g/L, pH=2                     | Color: >95%                                      |                     | (C. H. Wu et al., 2008)        |
| O <sub>3</sub> /MnO <sub>2</sub>               | C.I. Reactive Red 2      | [O <sub>3</sub> ]=500 mL/min, [Mn <sup>2+</sup> ]=0.5 g/L, [dye]=20 mg/L, pH=7                    |                                                  | 1.68                | (Wu et al., 2013)              |
| O <sub>3</sub> /Ca(OH) <sub>2</sub>            | Acid Red 18              | [O <sub>3</sub> ]=65 mg/L, [Ca(OH) <sub>2</sub> ]=2-3 g/L, [dye]=450 mg/L                         | Color:100% (Time=6 min), TOC:100% (Time =25 min) |                     | (Quan et al., 2017)            |
| O <sub>3</sub> /GAC                            | Reactive Red 194         | [O <sub>3</sub> ]=28 mg/L, [GAC]=10 g/L, [dye]=100 mg/L, pH=6.3                                   | COD:80%, TOC:50%                                 |                     | (Gül et al., 2007)             |
| O <sub>3</sub> /GAC                            | Reactive Yellow 145      | [O <sub>3</sub> ]=28 mg/L, [GAC]=10 g/L, [dye]=100 mg/L, pH=5.9                                   | COD:90%, TOC:50%                                 |                     | (Gül et al., 2007)             |

**Table S3** Textile wastewater treatment using photochemical AOPs.

| Process                          | Dye                                         | Conditions                                                                                         | Removal                             | EEO<br>(kWh m <sup>-3</sup><br>order <sup>-1</sup> )                                                                                                           | References                        |
|----------------------------------|---------------------------------------------|----------------------------------------------------------------------------------------------------|-------------------------------------|----------------------------------------------------------------------------------------------------------------------------------------------------------------|-----------------------------------|
| UV/H <sub>2</sub> O <sub>2</sub> | Raw textile wastewater                      | UV-C:25 W, [H <sub>2</sub> O <sub>2</sub> ]=50 mM, [TOC]=336 mg/L, [COD]=1476 mg/L, pH=10.7        | COD:2%, TOC:14%                     | 12.08                                                                                                                                                          | (Alaton and Balcioğlu, 2002)      |
| UV/H <sub>2</sub> O <sub>2</sub> | Biotreated textile wastewater               | UV-C:25 W, [H <sub>2</sub> O <sub>2</sub> ]=50 mM, [TOC]=58 mg/L, [COD]=325 mg/L, pH=7.7           | Color:88%, COD:41%                  | 14.22                                                                                                                                                          | (Alaton and Balcioğlu, 2002)      |
| UV/H <sub>2</sub> O <sub>2</sub> | C.I. Acid Orange 7                          | UV-C:15 W, [dye]=17.5 mg/L, [H <sub>2</sub> O <sub>2</sub> ]=166.25/285/525 mg/L                   | Color: 100%, TOC:95%                | 1.498, 2.696, 1.133                                                                                                                                            | (Aleboyeh et al., 2008)           |
| UV/H <sub>2</sub> O <sub>2</sub> | Six reactive dyestuffs                      | UV-C:18 W, [H <sub>2</sub> O <sub>2</sub> ]=25 mM, [DOC]=25/50 mg/L, pH=11.5                       | TOC: 30.5%/8.5%                     | 2.264, 4.848                                                                                                                                                   | (Arslan et al., 1999)             |
| UV/H <sub>2</sub> O <sub>2</sub> | Mixture of reactive dyes                    | UV-C:25 W, [H <sub>2</sub> O <sub>2</sub> ]=680 mg/L, [TOC]=46.8 mg/L, pH=7.0                      | TOC: 14.6%                          | 0.633                                                                                                                                                          | (Arslan et al., 2002)             |
| UV/H <sub>2</sub> O <sub>2</sub> | Acetate and polyester fiber dyeing effluent | UV-C:15 W, [H <sub>2</sub> O <sub>2</sub> ]=300 mg/L, [COD]=930 mg/L, pH=3                         | Color: 85%, COD: 90%                | 16.47                                                                                                                                                          | (Azbar et al., 2004)              |
| UV/H <sub>2</sub> O <sub>2</sub> | C.I. Reactive Blue 181                      | UV-C:100 mW, [dye]=100 mg/L, [H <sub>2</sub> O <sub>2</sub> ]=500 mg/L, pH=3.0                     | Color: 99%<br>COD: 61%,<br>TOC: 31% | -                                                                                                                                                              | (Basturk and Karatas, 2015)       |
| UV/H <sub>2</sub> O <sub>2</sub> | C.I. Acid Orange 7                          | UV-C:30 W, [H <sub>2</sub> O <sub>2</sub> ]= 500 mg/L, [dye]=19.55/29.40/39.25/48.34 mg/L          | -                                   | 2.51, 4.56, 5.90, 12.56                                                                                                                                        | (Behnajady and Modirshahla, 2006) |
| UV/H <sub>2</sub> O <sub>2</sub> | Acid Black 24                               | UV-C:14 W, [H <sub>2</sub> O <sub>2</sub> ]=5.8-69.8 mM, [TOC]=39.7 mg/L, [dye]=100 mg/L           | Color: 100%, TOC: 95%               | -                                                                                                                                                              | (Chang et al., 2006)              |
| UV/H <sub>2</sub> O <sub>2</sub> | C.I. Acid Orange 7                          | UV-C:15 W, [H <sub>2</sub> O <sub>2</sub> ]=4.98 × 10 <sup>-2</sup> M, [dye]=2/5/9/12/15 M, pH=6.0 | -                                   | 0.5782, 0.8575, 1.3411, 1.7682, 2.1880, 0.6187, 1.0473, 1.5610, 1.9948, 2.3343, 1.2488, 1.6696, 2.1777, 2.4485, 2.8550, 0.4562, 0.5665, 1.1654, 1.5738, 1.9378 | (Daneshvar et al., 2005)          |
| UV/H <sub>2</sub> O <sub>2</sub> | C.I. Acid Orange 8                          | UV-C:15 W, [H <sub>2</sub> O <sub>2</sub> ]=4.98 × 10 <sup>-2</sup> M, [dye]=2/5/9/12/15 M, pH=6.0 | -                                   |                                                                                                                                                                | (Daneshvar et al., 2005)          |
| UV/H <sub>2</sub> O <sub>2</sub> | C.I. Acid Orange 52                         | UV-C:15 W, [H <sub>2</sub> O <sub>2</sub> ]=4.98 × 10 <sup>-2</sup> M, [dye]=2/5/9/12/15 M, pH=6.0 | -                                   |                                                                                                                                                                | (Daneshvar et al., 2005)          |
| UV/H <sub>2</sub> O <sub>2</sub> | C.I. Acid Blue 74                           | UV-C:15 W, [H <sub>2</sub> O <sub>2</sub> ]=4.98 × 10 <sup>-2</sup> M, [dye]=2/5/9/12/15 M, pH=6.0 | -                                   |                                                                                                                                                                | (Daneshvar et al., 2005)          |
| UV/H <sub>2</sub> O <sub>2</sub> | Rhodamine B                                 | UV-C:15 W, [H <sub>2</sub> O <sub>2</sub> ]=450 mg/L, [dye]=10 mg/L, pH=6.0                        | Color: 97.3%                        | 26.6                                                                                                                                                           | (Daneshvar et al., 2008)          |
| UV/H <sub>2</sub> O <sub>2</sub> | Five azo-reactive dyes                      | UV-C:120 W, [H <sub>2</sub> O <sub>2</sub> ]=1 g/L, [dye]=100 mg/L                                 | Color: 100%, TOC: 80%, COD: 70%     | -                                                                                                                                                              | (Georgiou et al., 2002)           |
| UV/H <sub>2</sub> O <sub>2</sub> | Reactive Black 5                            | UV-C:15 W, [H <sub>2</sub> O <sub>2</sub> ]=408 mg/L, [dye]=40 mg/L                                | Color: 100%                         | 2.14                                                                                                                                                           | (Ince and Gönenç, 1997)           |
| UV/H <sub>2</sub> O <sub>2</sub> | C.I. Basic Blue 3                           | UV-C:30 W, [H <sub>2</sub> O <sub>2</sub> ]=1.2 g/L, [dye]=10 mg/L                                 | Color:95.03%                        | 7.67                                                                                                                                                           | (Kasiri and Khataee, 2011)        |
| UV/H <sub>2</sub> O <sub>2</sub> | C.I. Acid Green 25                          | UV-C:30 W, [H <sub>2</sub> O <sub>2</sub> ]=1.2 g/L, [dye]=10 mg/L                                 | Color:98.16%                        | 5.76                                                                                                                                                           | (Kasiri and Khataee, 2011)        |
| UV/H <sub>2</sub> O <sub>2</sub> | C.I. Acid Blue 92                           | UV-C:30 W, [H <sub>2</sub> O <sub>2</sub> ]=2 g/L, [dye]=20 mg/L                                   | Color: 93.51%                       | 19.41                                                                                                                                                          | (Kasiri and Khataee, 2012)        |
| UV/H <sub>2</sub> O <sub>2</sub> | C.I. Acid Black 1                           | UV-C:30 W, [H <sub>2</sub> O <sub>2</sub> ]=2 g/L, [dye]=20 mg/L                                   | Color: 99.5%                        | 10.02                                                                                                                                                          | (Kasiri and Khataee, 2012)        |
| UV/H <sub>2</sub> O <sub>2</sub> | Reactive Blue                               | UV-C:16 W, [H <sub>2</sub> O <sub>2</sub> ]=20 mmol, [dye]=500 ppm, time=30 min                    | Color: 99.64%                       | 5.334                                                                                                                                                          | (Manikandan et al., 2017)         |
| UV/H <sub>2</sub> O <sub>2</sub> | Direct Red                                  | UV-C:30 W, [H <sub>2</sub> O <sub>2</sub> ]=50 mmol, [dye]= 500 ppm                                | Color: 91.60%                       | 10.667                                                                                                                                                         | (Manikandan et al., 2017)         |

|                                                  |                                             |                                                                                                              |                                  |                     |                            |
|--------------------------------------------------|---------------------------------------------|--------------------------------------------------------------------------------------------------------------|----------------------------------|---------------------|----------------------------|
| UV/H <sub>2</sub> O <sub>2</sub>                 | Acid Violet                                 | UV-C:30 W, [H <sub>2</sub> O <sub>2</sub> ]=50 mmol, [dye]= 500 ppm                                          | Color: 75.87%                    | 16.005              | (Manikandan et al., 2017)  |
| UV/H <sub>2</sub> O <sub>2</sub>                 | C.I. Acid Red 88                            | UV-C:30 W, [H <sub>2</sub> O <sub>2</sub> ]= 850 mg/L, [dye]=20 mg/L, pH=2                                   | Color: 96.76%                    | 6.48                | (Modirshahla et al., 2012) |
| UV/H <sub>2</sub> O <sub>2</sub>                 | C.I. Acid Red 88                            | UV-C:30 W, [H <sub>2</sub> O <sub>2</sub> ]= 850 mg/L, [dye]=20 mg/L, pH=10                                  |                                  | 20.64               | (Modirshahla et al., 2012) |
| UV/H <sub>2</sub> O <sub>2</sub>                 | Brilliant Green                             | UV-C:15 W, [H <sub>2</sub> O <sub>2</sub> ]=4.0 mM, [dye]= 0.05 mM, pH=6.5,                                  |                                  | 7.8                 | (Rehman et al., 2018)      |
| UV/H <sub>2</sub> O <sub>2</sub>                 | Reactive red 241                            | UV-C:8 W, [H <sub>2</sub> O <sub>2</sub> ]=2 mL/L, pH=4/7/10                                                 | Color:97.8-99.4%, COD:53.5-60.6% |                     | (Patel et al., 2013)       |
| UV/H <sub>2</sub> O <sub>2</sub>                 | C.I. Reactive Red 2                         | UV-C:8 W, [H <sub>2</sub> O <sub>2</sub> ]=1000 mg/L, [dye]=40 mg/L, pH=7                                    | Color:89%                        | 2.26                | (Wu et al., 2013)          |
| UV/H <sub>2</sub> O <sub>2</sub>                 | Real textile wastewater (Color)             | UV-C:13W, [H <sub>2</sub> O <sub>2</sub> ]=100-300 mg/L, [COD]=413 mg/L                                      | -                                | 1.73, 3.25          | (Yen, 2016)                |
| UV/H <sub>2</sub> O <sub>2</sub>                 | Real textile wastewater (DOC)               | UV-C:13W, [H <sub>2</sub> O <sub>2</sub> ]=100-300 mg/L, [COD]=413 mg/L                                      | -                                | 3.9, 7.15           | (Yen, 2016)                |
| UV/H <sub>2</sub> O <sub>2</sub>                 | Textile effluent                            | UV:15 W, [H <sub>2</sub> O <sub>2</sub> ]=50 mg/L, [COD]=172 mg/L, pH=3                                      | Color:96%, COD:91%               | 5.17                | (Yonar et al., 2005)       |
| UV/PS                                            | Brilliant Green                             | pH=5.7, UVC:15 W, [PS]=4.0 mM, [dye]= 0.05 mM                                                                |                                  | 5.4                 | (Rehman et al., 2018)      |
| UV/PS                                            | C.I. Basic Yellow 2                         | UV-C:29.7 W/m <sup>2</sup> , [PS]=4.0 mM, [dye]=5 mM                                                         |                                  | 4.23                | (Salari et al., 2009)      |
| UV/PS                                            | C.I. Basic Yellow 2                         | UV-C:29.7 W/m <sup>2</sup> , [PS]=10 mM, [dye]=20 ppm                                                        |                                  | 5.288               | (Salari et al., 2008)      |
| UV/PMS                                           | Mixture azo dyes                            | UV-C:40 W, [PMS]=40 mM, [dye]=100 mg/L                                                                       | Color:95%                        | 2.9                 | (Olmez-Hanci et al., 2011) |
| UV/PMS                                           | Brilliant Green                             | UVC:15 W, [PMS]=4.0 mM, [dye]= 0.05 mM                                                                       |                                  | 6.8                 | (Rehman et al., 2018)      |
| UV/O <sub>3</sub>                                | Acetate and polyester fiber dyeing effluent | UV-C:15 W, [O <sub>3</sub> ]=2 g/h, COD=930 mg/L, pH=9                                                       | Color: 93%, COD: 94%             | 83.40               | (Azbar et al., 2004)       |
| UV/O <sub>3</sub>                                | C.I. Reactive Red 2                         | UV-A:8 W, [O <sub>3</sub> ]=500 mL/min, [dye]=20 mg/L, pH=7                                                  | Color:75%                        | 3.32                | (Wu et al., 2013)          |
| UV/O <sub>3</sub>                                | C.I. Reactive Red 2                         | UVC: 8W, [O <sub>3</sub> ]=500 mL/min, [dye]=40 mg/L, pH=4/7/10                                              |                                  | 6.420, 4.223, 1.865 | (Wu and Ng, 2008)          |
| UV/O <sub>3</sub>                                | Textile effluent                            | UV:15 W, [O <sub>3</sub> ]=2 g/h, [COD]=172 mg/L, pH=9                                                       | Color:98%, COD:95%               | 34.48               | (Yonar et al., 2005)       |
| UV/O <sub>3</sub> /Fe <sup>3+</sup>              | C.I. Reactive Red 2 (RR2)                   | UV-C:8W, [O <sub>3</sub> ]=500 mL/min, [Fe <sup>3+</sup> ]=25 mg/L, [dye]=40 mg/L, pH=4/7/10                 |                                  | 8.533, 4.240, 2.909 | (Wu and Ng, 2008)          |
| UV/H <sub>2</sub> O <sub>2</sub> /O <sub>3</sub> | C.I. Reactive Red 2                         | UV-C:8 W, [H <sub>2</sub> O <sub>2</sub> ]=1000 mg/L, [O <sub>3</sub> ]=500 mL/min, [dye]=40 mg/L, pH=7      |                                  | 3.46                | (Wu et al., 2013)          |
| UV/H <sub>2</sub> O <sub>2</sub> /O <sub>3</sub> | Acetate and polyester fiber dyeing effluent | UV-C:15 W, [H <sub>2</sub> O <sub>2</sub> ]=200 mg/L, [O <sub>3</sub> ]=2 g/h, [COD]=930 mg/L, pH=3          | Color: 96%, COD: 99%             | 85.49               | (Azbar et al., 2004)       |
| UV/H <sub>2</sub> O <sub>2</sub> /O <sub>3</sub> | C.I. Reactive Red 2                         | UV-C: 8W, [O <sub>3</sub> ]=500 mL/min, [H <sub>2</sub> O <sub>2</sub> ]=1000 mg/L, [dye]=40 mg/L, pH=4/7/10 |                                  | 2.256, 2.306, 3.141 | (Wu and Ng, 2008)          |
| UV/H <sub>2</sub> O <sub>2</sub> /O <sub>3</sub> | Textile effluent                            | UV:15 W, [H <sub>2</sub> O <sub>2</sub> ]=25 mg/L, [O <sub>3</sub> ]=2 g/h, [COD]=172 mg/L, pH=3             | Color:99%, COD:97%               | 40.38               | (Yonar et al., 2005)       |

**Table S4** Textile wastewater treatment using photocatalytic AOPs.

| Process             | Dye                  | Experimental conditions                                  | Removal efficiency       | EEO (kWh m <sup>-3</sup> order <sup>-1</sup> ) | References                   |
|---------------------|----------------------|----------------------------------------------------------|--------------------------|------------------------------------------------|------------------------------|
| UV/TiO <sub>2</sub> | Remazol Red F-3B     | UV:24 W, [TiO <sub>2</sub> ]=2 g/L, [dye]=150 mg/L, pH=7 | Color:97.17%, TOC:83.05% |                                                | (Akyol and Bayramoglu, 2008) |
| UV/TiO <sub>2</sub> | Procion Yellow H-EXL | UV:100 W, [TiO <sub>2</sub> ]=1 g/L, pH=5                | Color:100%, COD:89%      |                                                | (Barakat, 2010)              |
| UV/TiO <sub>2</sub> | C.I. Acid Red 27     | UV-C:15 W, [TiO <sub>2</sub> ]=400 mg/L, [dye]=20 mg/L   | -                        | 12.59                                          | (Behnajady et al., 2011)     |
| UV/TiO <sub>2</sub> | Methyl Orange        | UV-C:15 W, [TiO <sub>2</sub> ]=400 mg/L, [dye]=10 mg/L   | -                        | 34.8                                           | (Behnajady et al., 2011)     |
| UV/TiO <sub>2</sub> | Malachite Green      | UV-C:15 W, [TiO <sub>2</sub> ]=400 mg/L, [dye]=5 mg/L    | -                        | 9.23                                           | (Behnajady et al., 2011)     |

|                                         |                                            |                                                                                                                |                         |                                          |                               |
|-----------------------------------------|--------------------------------------------|----------------------------------------------------------------------------------------------------------------|-------------------------|------------------------------------------|-------------------------------|
| UV/TiO <sub>2</sub>                     | 4-Nitrophenol                              | UV-C:15 W, [TiO <sub>2</sub> ]=400 mg/L, [dye]=20 mg/L                                                         | -                       | 72.27                                    | (Behnajady et al., 2011)      |
| UV/TiO <sub>2</sub>                     | Acid Orange 7                              | UV-C:6 W, [TiO <sub>2</sub> ]=1 g/L, [dye]=40 mg/L, pH=6                                                       |                         |                                          | (Chen et al., 2005)           |
| UV/TiO <sub>2</sub>                     | C.I. Basic Red 46                          | UV-C: 30 W, TiO <sub>2</sub> :Degussa P25, [dye]=2.5-20 mg/L, pH = 7.4                                         |                         | 391.84, 553.85, 980.43, 1019.47, 1404.88 | (Khataee, 2009)               |
| UV/TiO <sub>2</sub>                     | C.I. Acid Orange 10                        | UVC: 21.9 W/m <sup>2</sup> , TiO <sub>2</sub> :Degussa P25, [dye]=30 mg/L, pH = 6.4                            | TOC:97.96%              | 70.67                                    | (Khataee et al., 2009)        |
| UV/TiO <sub>2</sub>                     | C.I. Acid Orange 12                        | pH = 6.1, [dye]=30 mg/L, UV-C: 21.9 W/m <sup>2</sup> , TiO <sub>2</sub> :Degussa P25                           | TOC:96.89%              | 85.65                                    | (Khataee et al., 2009)        |
| UV/TiO <sub>2</sub>                     | C.I. Acid Orange 8                         | pH = 6.9, [dye]=30 mg/L, UV-C:21.9 W/m <sup>2</sup> , TiO <sub>2</sub> :Degussa P25                            | TOC:94.47%              | 98.04                                    | (Khataee et al., 2009)        |
| UV/TiO <sub>2</sub>                     | Reactive Orange 16                         | UV-C:125 W, [dye]=50 mg/L, TiO <sub>2</sub> coated on glass Raschig rings/[TiO <sub>2</sub> ]=1 g/L suspension | -                       | 91, 52                                   | (Lizama et al., 2001)         |
| UV/TiO <sub>2</sub>                     | Reactive Red 2                             | UV-C:125 W, [dye]=50 mg/L, TiO <sub>2</sub> coated on glass Raschig rings/[TiO <sub>2</sub> ]=1 g/L suspension | -                       | 145, 69                                  | (Lizama et al., 2001)         |
| UV/TiO <sub>2</sub>                     | Reactive Yellow 2                          | UV-C:125 W, [dye]=50 mg/L, TiO <sub>2</sub> coated on glass Raschig rings/[TiO <sub>2</sub> ]=1 g/L suspension | -                       | 85, 41                                   | (Lizama et al., 2001)         |
| UV/TiO <sub>2</sub>                     | Reactive Blue 19                           | UV-C:125 W, [dye]=50 mg/L, TiO <sub>2</sub> coated on glass Raschig rings/[TiO <sub>2</sub> ]=1 g/L suspension | -                       | 139, 104                                 | (Lizama et al., 2001)         |
| UV/TiO <sub>2</sub>                     | Reactive Blue 19                           | UV-C: 125 W, [TiO <sub>2</sub> ]=0.5 g/L, [dye]=50 mg/L, TOC:32 ppm, pH=11                                     | TOC:46%                 | 7.6                                      | (Lizama et al., 2002)         |
| UV/TiO <sub>2</sub>                     | Reactive red 241                           | UV-C:8 W, [TiO <sub>2</sub> ]=0.05 g/L, pH=4                                                                   | Color:54.8%, COD: 24.6% |                                          | (Patel et al., 2013)          |
| UV/TiO <sub>2</sub>                     | Reactive red 241                           | UV-C:8 W, [TiO <sub>2</sub> ]=0.05 g/L, pH=7                                                                   | Color:26.5%, COD:11.6%  |                                          | (Patel et al., 2013)          |
| UV/TiO <sub>2</sub>                     | Reactive red 241                           | UV-C:8 W, [TiO <sub>2</sub> ]=0.05 g/L, pH=10                                                                  | Color:29.4%, COD:12.2%  |                                          | (Patel et al., 2013)          |
| UV/TiO <sub>2</sub>                     | Reactive Red 45                            | UV:125 W, [TiO <sub>2</sub> ]=0.5 g/L, [dye]=80 mg/L, pH=5                                                     | Color:59%, TOC:23%      |                                          | (Peternel et al., 2007)       |
| UV/TiO <sub>2</sub>                     | Acid Orange 7                              | UV-C:43 W, [TiO <sub>2</sub> ]=0.5 g/L, [dye]=5×10 <sup>-5</sup> M, pH=6.1                                     |                         | 273.93                                   | (Sadik, 2007)                 |
| UV/TiO <sub>2</sub>                     | C.I. Reactive Red 2                        | UV-A:8 W, [TiO <sub>2</sub> ]=0.5 g/L, [dye]=20 mg/L, pH=7                                                     | Color:64%               | 26.48                                    | (Wu et al., 2013)             |
| UV/TiO <sub>2</sub>                     | Methylene Blue                             | UV: 425 nm/250 W, [TiO <sub>2</sub> ]=1 g/L, [dye]=20 mg/L                                                     | Color:98%               | 107.31                                   | (Q. Zhang et al., 2013)       |
| UV-vis/HT/Fe/Fe                         | Biologically treated textile mill effluent | UV-vis, [HT/Fe/TiO <sub>2</sub> ]=2 mg/L, [dye]=50 mg/L, pH=10                                                 | Color:96%               |                                          | (Arcanjo et al., 2018)        |
| UV/TiO <sub>2</sub>                     | Real textile wastewater                    | UV-C: 315 nm/100 W, TiO <sub>2</sub> nanotubes, COD=153 mg/L, pH=3/8                                           | Color:93.6%             | 8.36, 12.41                              | (Cardoso et al., 2016)        |
| UV-LED/TiO <sub>2</sub>                 | Reactive Black 5                           | UVA-LED:0.0129 kW, [TiO <sub>2</sub> ]=1 g/L, [dye]=50 mg/L, flowrate=0.8 mL/min                               | Color:89%               | 220                                      | (Ferreira et al., 2016)       |
| UV-LED/TiO <sub>2</sub>                 | Malachite Green                            | UVA-LED: 10-12 mW, TiO <sub>2</sub> coated quartz tube, [dye]=5 mg/L                                           | Color:99%               | 789.47                                   | (Natarajan et al., 2011)      |
| UV-LED/TiO <sub>2</sub>                 | Methylene Blue                             | UVA-LED: 10-12 mW, TiO <sub>2</sub> coated quartz tube, [dye]=5 mg/L                                           | Color:61%               | 3000                                     | (Natarajan et al., 2011)      |
| UV-LED/TiO <sub>2</sub>                 | Rhodamine B                                | UVA-LED: 10-12 mW, TiO <sub>2</sub> coated quartz tube, [dye]=5 mg/L                                           | Color:62%               | 1500                                     | (Natarajan et al., 2011)      |
| UV/ZnO                                  | Eosin Y                                    | UV-C:16 W, [ZnO]=1 g/L, [dye]=50 mg/L, pH=6.9                                                                  | Color:39%, COD:8.1%     |                                          | (Chakrabarti and Dutta, 2004) |
| UV/ZnO                                  | Methylene Blue                             | UV-C:16 W, [ZnO]=1 g/L, [dye]=50 mg/L, pH=6.9                                                                  | Color:58%, COD:24%      |                                          | (Chakrabarti and Dutta, 2004) |
| UV/ZnO                                  | C.I. Acid Orange 7                         | UV-C:30 W, [ZnO]=160 mg/L, [dye]=20 mg/L, neutral pH                                                           | Color:100%              | 384                                      | (Daneshvar et al., 2007)      |
| UV/ZnO                                  | Reactive Blue 19 (RB 19)                   | pH=11, UVC: 125 W, [ZnO]=0.8 g/L, [dye]=50 mg/L, TOC:32 ppm, time=1 h                                          | TOC:60%                 | 22.4                                     | (Lizama et al., 2002)         |
| UV/ZnO                                  | Reactive Red 45                            | UV:125 W, [ZnO]=2.5 g/L, [dye]=80 mg/L, pH=5                                                                   | Color:58.3%, TOC:22.4%  |                                          | (Peternel et al., 2007)       |
| UV/ZnO                                  | C.I. Reactive Red 2                        | UV-A:8 W, [ZnO]=0.5 g/L, [dye]=20 mg/L, pH=7                                                                   | Color:51%               | 39.38                                    | (Wu et al., 2013)             |
| UV/TiO <sub>2</sub> /ZnO                | C.I. Reactive Red 2                        | UV-A:8 W, [TiO <sub>2</sub> /ZnO]=0.5 g/L, [dye]=20 mg/L, pH=7                                                 | Color:90%               | 12.69                                    | (Wu et al., 2013)             |
| UV/TiO <sub>2</sub> /SiO <sub>2</sub>   | Reactive Black 5                           | UV:365 nm/25 W, [TiO <sub>2</sub> ]=[SiO <sub>2</sub> ]=2024 mg/L, pH=5.8                                      |                         |                                          | (Aguedach et al., 2008)       |
| UV/SrTiO <sub>3</sub> /CeO <sub>2</sub> | Reactive Black 5                           | UV:200 W, [SrTiO <sub>3</sub> /CeO <sub>2</sub> ]=0.02 g/L, [dye]=100 mg/L, pH=12                              | Color:100%, COD:57%     |                                          | (Song et al., 2007a)          |

|                                                    |                    |                                                                                                                                    |                                           |                                      |
|----------------------------------------------------|--------------------|------------------------------------------------------------------------------------------------------------------------------------|-------------------------------------------|--------------------------------------|
| UV/SrTiO <sub>3</sub> /CeO <sub>2</sub>            | C.I. Direct Red 23 | UV:250 W, [SrTiO <sub>3</sub> /CeO <sub>2</sub> ]=1.5 g/L, [dye]=100 mg/L, pH=12                                                   | Color:97%, COD:69%                        | (Song et al., 2008)                  |
| UV/ZnO/SnO <sub>2</sub> /air                       | Methylene Blue     | UV:8 W, [ZnO]=[SnO <sub>2</sub> ]=0.5 g/L, Air:400 mL/min, [dye]=10 mg/L, pH=12                                                    | Color:96%                                 | (Chiang and Lin, 2013)               |
| UV/ZnO/air                                         | Acid Violet 7      | UV:8 W, [ZnO]=2 g/L, [air]=8.1 mL/s, [dye]=5×10 <sup>-4</sup> M, pH=9                                                              | Color:94.4%                               | (Krishnakumar and Swaminathan, 2011) |
| UV/TiO <sub>2</sub> /H <sub>2</sub> O <sub>2</sub> | Acid Orange 7      | UV-C:43 W, [TiO <sub>2</sub> ]=0.5 g/L, [H <sub>2</sub> O <sub>2</sub> ]=(8.82-71) ×10 <sup>-3</sup> M, [dye]=5×10 <sup>-5</sup> M | 117.84, 68.48, 49.49, 40.45               | (Sadik, 2007)                        |
| UV/TiO <sub>2</sub> /IO <sub>4</sub> <sup>-</sup>  | Acid Orange 7      | UV-C:43 W, [TiO <sub>2</sub> ]=0.5 g/L, [IO <sub>4</sub> ]= (4.67-100) ×10 <sup>-5</sup> M, [dye]=5×10 <sup>-5</sup> M             | 102.39, 35.67, 11.97, 8.36                | (Sadik, 2007)                        |
| UV/TiO <sub>2</sub> /H <sub>2</sub> O <sub>2</sub> | Methylene Blue     | UV: 425 nm/250 W, [TiO <sub>2</sub> ]=1 g/L, [dye]=20 mg/L, [H <sub>2</sub> O <sub>2</sub> ]=20/40/80/100 mg/L                     | Color:98%<br>52.32, 48.40, 40.79, 38.09   | (Q. Zhang et al., 2013)              |
| UV/ZnO/H <sub>2</sub> O <sub>2</sub>               | C.I. Acid Orange 7 | UV-C:30 W, [ZnO]=160 mg/L, [H <sub>2</sub> O <sub>2</sub> ]=10 mM, [dye]=20 mg/L                                                   | Color:100%<br>172                         | (Daneshvar et al., 2007)             |
| UV/WO <sub>3</sub>                                 | Acid Orange 7      | UV-C:125 W, [WO <sub>3</sub> ]=1 g/L, [dye]=5-50 mg/L, pH=3                                                                        | 213.33, 424.78, 2000, 2823.53, 4800, 8000 | (Mohagheghian et al., 2015)          |

**Table S5** Textile wastewater treatment using Fenton-based AOPs.

| Process        | Dye                                         | Experimental conditions                                                                                                                     | Removal efficiency                | EEO (kWh m <sup>-3</sup> order <sup>-1</sup> ) | References                          |
|----------------|---------------------------------------------|---------------------------------------------------------------------------------------------------------------------------------------------|-----------------------------------|------------------------------------------------|-------------------------------------|
| Fenton         | Acetate and polyester fiber dyeing effluent | [Fe <sup>2+</sup> ]=500 mg/L, [H <sub>2</sub> O <sub>2</sub> ]=300 mg/L, [COD]=930 mg/L, pH=5                                               | Color: 94%, COD: 96%              | 3.01                                           | (Azbar et al., 2004)                |
| Fenton         | Real textile wastewater                     | [Fe <sup>2+</sup> ]=400 mg/L, [H <sub>2</sub> O <sub>2</sub> ]=550 mg/L, [COD]=660-2660 mg/L, pH=3.0±0.2                                    | Color:100%, COD:>90%              |                                                | (Badawy and Ali, 2006)              |
| Fenton         | Real textile wastewater                     | [Fe <sup>2+</sup> ]= mM, [H <sub>2</sub> O <sub>2</sub> ]= mM, [COD]=1610 mg/L, pH=11.5                                                     | Color:99.6%, COD:81.4%            | 0.0137                                         | (Buthiyappan and Abdul Raman, 2019) |
| Fenton         | Textile effluent (Color)                    | [Fe <sup>2+</sup> ]=50 mg/L, [H <sub>2</sub> O <sub>2</sub> ]=1 mL/L                                                                        | Color:45%, 21.8%                  | 0.7, 0.66                                      | (Durr-E-Shahwar et al., 2012)       |
| Fenton         | Textile effluent (COD)                      | [Fe <sup>2+</sup> ]=50 mg/L, [H <sub>2</sub> O <sub>2</sub> ]=1 mL/L                                                                        | Color:45%, 21.8%                  | 0.8, 0.98                                      | (Durr-E-Shahwar et al., 2012)       |
| Fenton         | Direct Blue 71                              | [Fe <sup>2+</sup> ]=3 mg/L, [H <sub>2</sub> O <sub>2</sub> ]=125 mg/L, [COD]=139.9 mg/L, pH=3.0                                             | Color: 94%, COD: 50.7%            |                                                | (Ertugay and Acar, 2017)            |
| Fenton         | Real textile effluent                       | [COD]=1132.6 mg/L, [Fe <sup>2+</sup> ]:[H <sub>2</sub> O <sub>2</sub> ]=1:25, pH=3                                                          | Color:>92%                        |                                                | (Hayat et al., 2015)                |
| Fenton         | Direct Red 80                               | [Fe <sup>2+</sup> ]=30 mg/L, [H <sub>2</sub> O <sub>2</sub> ]=330 mg/L, [dye]=150 mg/L, pH=3.5                                              | Color: 99.77%                     |                                                | (Jogani et al., 2017)               |
| Fenton         | Direct Yellow 50                            | [Fe <sup>2+</sup> ]=1 mM, [H <sub>2</sub> O <sub>2</sub> ]=10 mM, [dye]=0.02 mM, pH=3                                                       |                                   | 17.59                                          | (Mahmoud and Ismail, 2011)          |
| Photo-Fenton   | Six reactive dyestuffs                      | UV-C:18 W, [H <sub>2</sub> O <sub>2</sub> ]=25 mM, [Fe <sup>2+</sup> ]=0.5 mM, [DOC]=25 mg/L, pH=11.5                                       |                                   | 0.56                                           | (Arslan et al., 2000)               |
| Photo-Fenton   | Real textile wastewater                     | UV-C:20 W, [COD]=1610 mg/L, [H <sub>2</sub> O <sub>2</sub> ]:[COD]=8.87, [H <sub>2</sub> O <sub>2</sub> ]:[Fe <sup>2+</sup> ]=4.82, pH=5.36 | Color:99.9%, COD:91.2%, TOC:78.5% | 0.0119                                         | (Buthiyappan and Abdul Raman, 2019) |
| Photo-Fenton   | Textile effluent (Color)                    | UV-C:108 W, [Fe <sup>2+</sup> ]=50 mg/L, [H <sub>2</sub> O <sub>2</sub> ]=1 mL/L                                                            | Color:56%, 39%                    | 43.0, 40.0                                     | (Durr-E-Shahwar et al., 2012)       |
| Photo-Fenton   | Textile effluent (COD)                      | UV-C:108 W, [Fe <sup>2+</sup> ]=50 mg/L, [H <sub>2</sub> O <sub>2</sub> ]=1 mL/L                                                            | Color:56%, 39%                    | 46.0, 59.5                                     | (Durr-E-Shahwar et al., 2012)       |
| Photo-Fenton   | Direct Yellow 50                            | UV-C:4 W, [Fe <sup>2+</sup> ]=1 mM, [H <sub>2</sub> O <sub>2</sub> ]=10 mM, [dye]=0.02 mM, pH=3                                             |                                   | 7.66                                           | (Mahmoud and Ismail, 2011)          |
| Photo-Fenton   | C.I. Reactive Red 2                         | UV-C:8 W, [Fe <sup>3+</sup> ]=25 mg/L, [H <sub>2</sub> O <sub>2</sub> ]=1000 mg/L, [dye]=20 mg/L, pH=7                                      | Color:92%                         | 2.01                                           | (Wu et al., 2013)                   |
| Electro-Fenton | Dye bath effluents                          | Anode: Ti/Ru <sub>0.15</sub> Ti <sub>0.85</sub> O <sub>2</sub> (DSA), [dye]=231 mg/L, pH=3, I=100 mA                                        |                                   | 7.4                                            | (Nakamura et al., 2019)             |
| Electro-Fenton | Reactive Blue 4                             | Anode: Ti/Ru <sub>0.15</sub> Ti <sub>0.85</sub> O <sub>2</sub> (DSA), [dye]=231 mg/L, pH=3, I=100/200 mA                                    |                                   | 0.5, 0.7                                       | (Nakamura et al., 2019)             |
| Electro-Fenton | Acid Orange 7                               | Anode:carbon felt, Cathode:carbon felt, [dye]=0.1 mM, [Fe <sup>3+</sup> ]=0.1 mM, I=0.3 A, pH=3                                             | TOC:92%                           |                                                | (Özcan et al., 2009)                |

|                      |                          |                                                                                                                                                                                                                                                                                  |                     |                     |                                  |
|----------------------|--------------------------|----------------------------------------------------------------------------------------------------------------------------------------------------------------------------------------------------------------------------------------------------------------------------------|---------------------|---------------------|----------------------------------|
| Electro-Fenton       | Orange II                | Anode:graphite cloth, Cathode:graphite cloth, [dye]=50 mg/L, [Fe <sup>2+</sup> ]=0.2 mM, I=300 mA/cm <sup>2</sup> , pH=3                                                                                                                                                         | Color:100%, TOC:63% |                     | (Peralta-Hernández et al., 2008) |
| Electro-Fenton       | Acid Orange 7            | ΔE <sub>cell</sub> =1.8 V, I=0.200 A, Cathode: FC, Anode:304 Stainless Steel Mes, Catholyte:1.5 L of 70 mg/LNA7+0.05M Na <sub>2</sub> SO <sub>4</sub> +1mM FeSO <sub>4</sub> , pH=2; Anolyte:1.5 L of NA7+0.8M H <sub>2</sub> SO <sub>4</sub> +5mM H <sub>2</sub> O <sub>2</sub> |                     | 0.379               | (Ramírez-Pereda et al., 2019)    |
| Electro-Fenton       | Acid Yellow 36           | Anode:boron doped diamond, Cathode:carbon-PTFE, [Fe <sup>2+</sup> ]=0.5 mM, I=3 A, [dye]=108 mg/L, pH=3                                                                                                                                                                          | Color:100%, TOC:71% |                     | (Ruiz et al., 2011)              |
| Electro-Fenton       | Methyl Orange            | Anode:Pt sheet, Cathode:graphite felt, I=50 A/m <sup>2</sup> , pH=3/7                                                                                                                                                                                                            | -                   | 2.25, 4.5           | (Yu et al., 2015)                |
| Electro-Fenton       | Methyl Orange            | Anode:Pt sheet, Cathode:carbon/graphite-PTFE, I=50 A/m <sup>2</sup> , pH=3/7                                                                                                                                                                                                     | Color:95.7%, 85.3%  | 0.75, 1.26          | (Yu et al., 2015)                |
| Photo-Fenton (Solar) | Textile effluent (Color) | Sunlight, [Fe <sup>2+</sup> ]=50 mg/L, [H <sub>2</sub> O <sub>2</sub> ]=1 ml/L                                                                                                                                                                                                   | Color:61%, 52%      | 0.3, 0.3            | (Durr-E-Shahwar et al., 2012)    |
| Photo-Fenton (Solar) | Textile effluent (COD)   | Sunlight, [Fe <sup>2+</sup> ]=50 mg/L, [H <sub>2</sub> O <sub>2</sub> ]=1 ml/L                                                                                                                                                                                                   | COD:66%, 84%        | 0.4, 0.5            | (Durr-E-Shahwar et al., 2012)    |
| Ozone-Photo-Fenton   | C.I. Reactive Red 2      | UV-C:8 W, [O <sub>3</sub> ]=500 mL/min, [Fe <sup>3+</sup> ]=25 mg/L, [H <sub>2</sub> O <sub>2</sub> ]=1000 mg/L, [dye]=20 mg/L, pH=7                                                                                                                                             | Color:99%           | 3.20                | (Wu et al., 2013)                |
| Ozone-Photo-Fenton   | C.I. Reactive Red 2      | [O <sub>3</sub> ]=500 mL/min, [H <sub>2</sub> O <sub>2</sub> ]=1000 mg/L, [Fe <sup>3+</sup> ]=25 mg/L, [dye]=40 mg/L, pH=4/7/10                                                                                                                                                  |                     | 0.979, 2.133, 2.972 | (Wu and Ng, 2008)                |
| Photo-Electro-Fenton | Reactive Blue 4          | UV-A:12 W, Anode: Ti/Ru <sub>0.15</sub> Ti <sub>0.85</sub> O <sub>2</sub> (DSA), [dye]=231 mg/L, pH=3, I=100/200 mA                                                                                                                                                              |                     | 0.5, 0.7            | (Nakamura et al., 2019)          |
| Photo-Electro-Fenton | C.I. Acid Blue 5         | UV-C:15 W, I=0.3 A, [FR]=10 L/h, [Fe <sup>3+</sup> ]=0.2 mM, [H <sub>2</sub> O <sub>2</sub> ]= ml/L, [dye]=10 mg/L, pH=3                                                                                                                                                         |                     | 1.25                | (Khataee et al., 2014)           |

**Table S6** Textile wastewater treatment using electrochemical AOPs.

| Process         | Dye                    | Experimental condition                                                                                                                                                           | Removal efficiency   | EEO (kWh m <sup>-3</sup> order <sup>-1</sup> ) | Ref                       |
|-----------------|------------------------|----------------------------------------------------------------------------------------------------------------------------------------------------------------------------------|----------------------|------------------------------------------------|---------------------------|
| Electrochemical | Real textile effluents | Anode:BDD, COD:160 mg/L, I=40 mA/cm <sup>2</sup>                                                                                                                                 | Color:100%, COD:99%  |                                                | (Abdessamad et al., 2013) |
| Electrochemical | Real textile effluents | Anode:Ti-Pt/β-PbO <sub>2</sub> , COD:729.0 mg/L, I=15 mA/cm <sup>2</sup>                                                                                                         | Color:100%, COD:50%  |                                                | (Aquino et al., 2011)     |
| Electrochemical | Real textile effluents | Anode:BDD, COD:729.0 mg/L, I=5 mA/cm <sup>2</sup>                                                                                                                                | Color:100%, COD:100% |                                                | (Aquino et al., 2011)     |
| Electrochemical | Real textile effluents | Anode:Ti-Pt/β-PbO <sub>2</sub> , COD:550.0 mg/L, I=75 mA/cm <sup>2</sup>                                                                                                         | Color:100%, COD:86%  |                                                | (Aquino et al., 2014)     |
| Electrochemical | Real textile effluents | Anode:Ti/Ti <sub>0.7</sub> Ru <sub>0.3</sub> O <sub>2</sub> (DSA), COD:550.0 mg/L, I=75 mA/cm <sup>2</sup>                                                                       | Color:100%, COD:55%  |                                                | (Aquino et al., 2014)     |
| Electrochemical | Rhodamine B            | Anode:Ti/RuO <sub>2</sub> -IrO <sub>2</sub> (DSA), electrolyte=0.1 mol/L Na <sub>2</sub> SO <sub>4</sub> +0.05 mol/L NaCl, [dye]=50 mg/L, T=25 °C, I=20/30/40 mA/cm <sup>2</sup> | Color:100%           | 8.229, 7.680, 9.397                            | (Baddouh et al., 2018)    |
| Electrochemical | Rhodamine B            | Anode:Ti/RuO <sub>2</sub> -IrO <sub>2</sub> DSA, electrolyte=0.1 mol/L Na <sub>2</sub> SO <sub>4</sub> +0.05 mol/L NaCl, [dye]=50 mg/L, I=40 mA/cm <sup>2</sup> , T=25/30/35 °C  | Color:100%           | 8.749, 13.584, 7.453                           | (Baddouh et al., 2018)    |
| Electrochemical | Rhodamine B            | Anode:SnO <sub>2</sub> , Electrolyte=0.1 mol/L Na <sub>2</sub> SO <sub>4</sub> +0.05 mol/L NaCl, [dye]=50 mg/L, T=25 °C, I=20/30/40 mA/cm <sup>2</sup>                           | Color:100%           | 23.467, 15.890, 16.000                         | (Baddouh et al., 2018)    |
| Electrochemical | Rhodamine B            | Anode:SnO <sub>2</sub> , electrolyte=0.1 mol/L Na <sub>2</sub> SO <sub>4</sub> +0.05 mol/L NaCl, [dye]=50 mg/L, I=40 mA/cm <sup>2</sup> , T=25/30/35 °C                          | Color:100%           | 13.737, 15.059, 12.16                          | (Baddouh et al., 2018)    |
| Electrochemical | Real textile effluents | Electrode:Ti/TiOx-RuOx, COD:5800 mg/L, I=5 mA/cm <sup>2</sup>                                                                                                                    | Color:100%, COD:98%  |                                                | (Basha et al., 2012)      |
| Electrochemical | Real textile effluents | Anode: Ti/TiOx-RuOx, COD:560.0 mg/L, I=5 mA/cm <sup>2</sup>                                                                                                                      | Color:100%, COD:95%  |                                                | (Basha et al., 2012)      |

|                 |                        |                                                                                                                                                                              |                           |                  |                                 |
|-----------------|------------------------|------------------------------------------------------------------------------------------------------------------------------------------------------------------------------|---------------------------|------------------|---------------------------------|
| Electrochemical | Alphazurine            |                                                                                                                                                                              | Color:100%,<br>COD:95%    |                  | (Bensalah et al., 2009)         |
| Electrochemical | Real textile effluents | Anode:BDD, Cathode:zirconium, [dye]=500 mg/L, I=30 mA/cm <sup>2</sup><br>Anode:Ti/Ta/Ir/Pt alloy, Electrolyte:Raw effluent, COD:404 mg/L, I=26.5 mA/cm <sup>2</sup>          | Color:60% (180 min)       |                  | (Chatzisymeon et al., 2006)     |
| Electrochemical | Real textile effluents | Anode:Ti/Ta/Ir/Pt alloy, Electrolyte:Raw effluent+0.5% NaCl, COD:404 mg/L, I=26.5 mA/cm <sup>2</sup>                                                                         | Color:>95% (10-15 min)    |                  | (Chatzisymeon et al., 2006)     |
| Electrochemical | Congo Red              | Anode:BDD, Cathode:stainless steel, [dye]=500 mg/L, I=30 mA/cm <sup>2</sup> , pH=7                                                                                           | TOC:100%,<br>COD:100%     |                  | (Faouzi Elahmadi et al., 2009)  |
| Electrochemical | Reactive Violet 2      | Anode:graphite rods, Cathode:stainless steel, [dye]=100 mg/L, I=79 mA/cm <sup>2</sup> , pH=7                                                                                 |                           | 14.25            | (Hamad et al., 2018)            |
| Electrochemical | Acid Brown 14          | Anode:graphite rods, Cathode:stainless steel, [dye]=100 mg/L, I=79 mA/cm <sup>2</sup> , pH=6                                                                                 |                           | 11.2             | (Hamad et al., 2018)            |
| Electrochemical | Real textile effluents | Anode:Ti/β-PbO <sub>2</sub> , COD:250 mg/L, I=12 mA/cm <sup>2</sup>                                                                                                          | Color:60%,<br>COD:78%     |                  | (Ling et al., 2016)             |
| Electrochemical | Real textile effluent  | Electrode: Ti/Ru <sub>0.3</sub> Ti <sub>0.7</sub> O <sub>2</sub> DSA, TOC:225 mg, UV-vis band: 490/620/660 nm, I=40 mA/cm <sup>2</sup>                                       | Color: 9.9%/7.3%/7.4%     | 1286, 1769, 1744 | (Malpass et al., 2007)          |
| Electrochemical | Real textile effluent  | Electrode: Ti/Ru <sub>0.3</sub> Ti <sub>0.7</sub> O <sub>2</sub> DSA, TOC:225 mg, UV-vis band: 490/620/660 nm, I=60 mA/cm <sup>2</sup>                                       | Color: 22.5%/22.8%/21.3%  | 971, 947, 1050   | (Malpass et al., 2007)          |
| Electrochemical | Real textile effluent  | Electrode: Ti/Ru <sub>0.1</sub> Sn <sub>0.9</sub> O <sub>2</sub> DSA, Electrolyte: effluent+0.1 mol/L NaCl, TOC:225 mg, UV-vis band: 490/620/660 nm, I=40 mA/cm <sup>2</sup> | Color: 90%/95%/96%        | 37,29,27         | (Malpass et al., 2008)          |
| Electrochemical | Real textile effluent  | Electrode: Ti/Ru <sub>0.2</sub> Sn <sub>0.8</sub> O <sub>2</sub> DSA, Electrolyte: effluent+0.1 mol/L NaCl, TOC:225 mg, UV-vis band: 490/620/660 nm, I=40 mA/cm <sup>2</sup> | Color: 91%/93%/94%        | 34,30,28         | (Malpass et al., 2008)          |
| Electrochemical | Real textile effluent  | Electrode: Ti/Ru <sub>0.3</sub> Sn <sub>0.7</sub> O <sub>2</sub> DSA, Electrolyte: effluent+0.1 mol/L NaCl, TOC:225 mg, UV-vis band: 490/620/660 nm, I=60 mA/cm <sup>2</sup> | Color: 91%/85%/84%        | 34,42,43         | (Malpass et al., 2008)          |
| Electrochemical | Real textile effluent  | Electrode: Ti/Ir <sub>0.3</sub> Ti <sub>0.7</sub> O <sub>2</sub> DSA, Electrolyte: effluent+0.1 mol/L NaCl, TOC:225 mg, UV-vis band: 490/620/660 nm, I=40 mA/cm <sup>2</sup> | Color: 79%/85%/87%        | 58,48,45         | (Malpass et al., 2008)          |
| Electrochemical | Real textile effluent  | Electrode: Ti/Ru <sub>0.3</sub> Ti <sub>0.7</sub> O <sub>2</sub> DSA, Electrolyte: effluent+0.1 mol/L NaCl, TOC:225 mg, UV-vis band: 490/620/660 nm, I=40 mA/cm <sup>2</sup> | Color: 95%/96%/96%        | 28,26,26         | (Malpass et al., 2008)          |
| Electrochemical | Real textile effluents | Anode:BDD, Cathode:Ti plate, Electrolyte: effluent+Na <sub>2</sub> SO <sub>4</sub> , COD:650.0 mg/L, I=40 mA/cm <sup>2</sup>                                                 | Color:100%,<br>COD:100%   |                  | (Martinez-Huitile et al., 2012) |
| Electrochemical | Dye bath effluents     | Anode: Ti/Ru <sub>0.15</sub> Ti <sub>0.85</sub> O <sub>2</sub> DSA, [dye]=231 mg/L, pH=3, I=100 mA                                                                           |                           | 54.8             | (Nakamura et al., 2019)         |
| Electrochemical | Reactive Blue 4        | Anode: Ti/Ru <sub>0.15</sub> Ti <sub>0.85</sub> O <sub>2</sub> (DSA), [dye]=231 mg/L, pH=3, I=100/200 mA                                                                     |                           | 7.4, 16.5        | (Nakamura et al., 2019)         |
| Electrochemical | Procion Yellow Hexl    | Anode:Ti/SnO <sub>2</sub> -Sb-Pt, Cathode: stainless steel, I=125 mA/cm <sup>2</sup> , [dye]=1.5 g/L, pH=7                                                                   | COD:41.09%,<br>TOC:37.30% | 220              | (Orts et al., 2018)             |
| Electrochemical | Procion Crimson Hexl   | Anode:Ti/SnO <sub>2</sub> -Sb-Pt, Cathode: stainless steel, I=125 mA/cm <sup>2</sup> , [dye]=1.5 g/L, pH=7                                                                   | COD:44.23%,<br>TOC:19.72% | 740              | (Orts et al., 2018)             |
| Electrochemical | Procion Navy Hexl      | Anode:Ti/SnO <sub>2</sub> -Sb-Pt, Cathode: stainless steel, I=125 mA/cm <sup>2</sup> , [dye]=1.5 g/L, pH=7                                                                   | COD:59.35%,<br>TOC:41.33% | 640              | (Orts et al., 2018)             |
| Electrochemical | Alizarin Red           | Anode:Pt grid, Cathode:GDE, [dye]=120 mg/L, [Fe <sup>2+</sup> ]=1 mM, [air]=20 mL/s, pH=3                                                                                    | TOC:93%                   |                  | (Panizza and Cerisola, 2009)    |
| Electrochemical | Methylene              | Anode:Ti/Pt, Cathode:Ti plates, [dye]=100 mg/L, I=40 mA/cm <sup>2</sup>                                                                                                      | Color:100%,<br>TOC:50%    |                  | (Tavares et al., 2012)          |



|                 |                                                   |                                                                                                                           |                      |       |                                   |
|-----------------|---------------------------------------------------|---------------------------------------------------------------------------------------------------------------------------|----------------------|-------|-----------------------------------|
| Electrochemical | Methylene                                         | Anode:Ti/Ru <sub>0.3</sub> /Ti <sub>0.7</sub> O <sub>2</sub> , Cathode:Ti plates, [dye]=100 mg/L, I=40 mA/cm <sup>2</sup> | Color:100%, TOC:35%  |       | (Tavares et al., 2012)            |
| Electrochemical | Real textile effluents                            | Anode:BDD, COD:470 mg/L, I=8 mA/cm <sup>2</sup>                                                                           | Color:100%, COD:80%  |       | (Tsantaki et al., 2012)           |
| Electrochemical | Real textile effluents                            | Anode:Ti/Pt, DOC:124 mg/L, I=177 mA/cm <sup>2</sup>                                                                       | Color:96%            |       | (Sala and Gutiérrez-Bouzán, 2014) |
| Electrochemical | Real textile effluents                            | Anode:BDD, COD:1000 mg/L, I=60 mA/cm <sup>2</sup>                                                                         | Color:100%, COD:100% |       | (Solano et al., 2013)             |
| Electrochemical | C.I. Acid Blue 92                                 | Anode:BDD, Cathode:carbon nanotubes-polytetrafluoroethylene, [dye]=20 mg/L, I=0.1 A, pH=6, flow rate=10 L/h               | Color:37.65%         | 55.95 | (Vahid and Khataee, 2013)         |
| Electrochemical | Wastewater from total dyeing and finishing stages | Anode:Ti/Pt, Cathode:stainless steel, [dye]=1250 mg/L, pH=5                                                               | Color:100%           |       | (Vlyssides et al., 2000)          |
| Electrochemical | Wastewater from dyeing stages                     | Anode:Ti/Pt, Cathode:stainless steel, [dye]=3325 mg/L, pH=5                                                               | Color:100%           |       | (Vlyssides et al., 2000)          |
| Electrochemical | Real textile effluents                            | Anode:Ti/Pt, COD:1354 mg/L, I=80 mA/cm <sup>2</sup>                                                                       | Color:100%, COD:50%  |       | (Wang et al., 2009)               |

**Table S7** Textile wastewater treatment using US-based AOPs.

| Process                 | Dye                      | Experimental condition                                                           | Removal efficiency  | EEO (kWh m <sup>-3</sup> order <sup>-1</sup> ) | Ref                             |
|-------------------------|--------------------------|----------------------------------------------------------------------------------|---------------------|------------------------------------------------|---------------------------------|
| US                      | Malachite Green          | US:35 kHz, PD=0.049 W/mL, MA=150 rpm, T=294±0.5 K, [dye]=4.89/6.82/9.87 mg/L     | -                   | 633.79, 870.40, 1231.70                        | (Behnajady and Vahid, 2016)     |
| US                      | Malachite Green          | US:35 kHz, PD=0.049 W/mL, MA=150 rpm, [dye]=5 mg/L, T=297/302/307 K              | -                   | 572.63, 438.12, 373.03                         | (Behnajady and Vahid, 2016)     |
| US                      | Malachite Green          | US:35 kHz, MA=150 rpm, T=294±0.5 K, [dye]=5 mg/L, PD=0.07/0.098/0.163 W/mL       | -                   | 818.05, 952.99, 1157.45                        | (Behnajady and Vahid, 2016)     |
| US                      | Malachite Green          | US:35 kHz, PD=0.049 W/mL, T=294±0.5 K, [dye]=5 mg/L, MA=75/400 rpm               | -                   | 777.14, 466.28                                 | (Behnajady and Vahid, 2016)     |
| US                      | C.I. Reactive Orange 107 | US:850 kHz, P <sub>E</sub> = 136 W, V= 500 mL, [dye]=50/100/200 mg/L             | Color: 99%          | 1770, 2089, 2222                               | (Dede et al., 2019)             |
| US                      | Reactive azo dye         | US:520 kHz, [dye]=19.95 mg/L                                                     | -                   | 10964.69                                       | (Mahamuni and Adewuyi, 2010)    |
| US/O <sub>3</sub>       | C.I. Reactive 5          | US:520 kHz, [O <sub>3</sub> ]=3.36 g/L, [dye]=363 mg/L, pH=7                     | TOC:76%             |                                                | (Ince and Tezcanli, 2001)       |
| US/O <sub>3</sub>       | Azobenzene dye           | US:500 kHz, O <sub>3</sub> =50 mL/min, [dye]=10 uM, pH=6.5                       | TOC:80%             |                                                | (Destailats et al., 2000)       |
| US/O <sub>3</sub>       | Methyle Orange           | US:500 kHz, O <sub>3</sub> =50 mL/min, [dye]=10 uM, pH=6.5                       | TOC:80%             |                                                | (Destailats et al., 2000)       |
| US/O <sub>3</sub>       | Reactive Yellow 84       | US:20 kHz, [O <sub>3</sub> ]=4.6 g/h, [dye]=500 mg/L, pH=4.5                     | TOC:56%             |                                                | (He et al., 2007)               |
| US/O <sub>3</sub>       | Reactive azo dye         | US:520 kHz, [O <sub>3</sub> ]=40 mg/L, [dye]=19.95 mg/L                          | -                   | 1215.02                                        | (Mahamuni and Adewuyi, 2010)    |
| US/O <sub>3</sub>       | C.I. Direct Red 23       | US:20 kHz, [O <sub>3</sub> ]=3.2 g/h, [dye]=100 mg/L, pH=8                       | Color:100%          |                                                | (Song et al., 2007b)            |
| US/UV                   | Acid Orange 7            | US:20 kHz, UV:632 nm/100 mW/mm <sup>2</sup> , [dye]=50 mg/L                      | Color:65%           |                                                | (Ma et al., 2006)               |
| US/UV                   | Reactive azo dye         | US:520 kHz, UV-C:18 W, [dye]=19.95 mg/L                                          | -                   | 3698.09                                        | (Mahamuni and Adewuyi, 2010)    |
| US/UV/ZnO               | C.I. Reactive Red 198    | US:40 kHz, UV:15 W, [ZnO]=1 g/L, [dye]=20 mg/L, pH=7                             | TOC:75%             |                                                | (Wu, 2008)                      |
| US/UV/O <sub>3</sub>    | Reactive azo dye         | US:520 kHz, UV-C:18 W, [O <sub>3</sub> ]=40 mg/L, [dye]=19.95 mg/L               | -                   | 989.9                                          | (Mahamuni and Adewuyi, 2010)    |
| US/UV/O <sub>3</sub>    | Acid Orange 7            | US:520 kHz, UV:18 W, [O <sub>3</sub> ]=40 g/m <sup>3</sup> , [dye]=50 uM, pH=5.5 | TOC:45%             |                                                | (Tezcanli-Güyer and Ince, 2004) |
| US/UV/TiO <sub>2</sub>  | C.I. Acid Orange 52      | US:200 kHz, UV:20 W, [TiO <sub>2</sub> ]=0.6 g/L, [dye]=25 mg/L                  | Color:100%, TOC:35% |                                                | (Maezawa et al., 2007)          |
| US/Fe <sup>0</sup>      | Acid Orange 7            | US:20 kHz, UV:300 W, [Fe <sup>0</sup> ]=2 g/L, [dye]=20 mg/L, pH=2.5             | Color:96%           |                                                | (Wang et al., 2014)             |
| US/Fe <sup>0</sup> /GAC | Acid Orange 7            | US:40 kHz, [Fe <sup>0</sup> ]=12 g, [GAC]=2.3 g, [dye]=1000 mg/L, pH=4           | Color:80%, TOC:57%  |                                                | (Liu et al., 2007)              |

## Reference

- Abdessamad, N.E.H., Akrouit, H., Hamdaoui, G., Elghniji, K., Ksibi, M., Bousselmi, L., 2013. Evaluation of the efficiency of monopolar and bipolar BDD electrodes for electrochemical oxidation of anthraquinone textile synthetic effluent for reuse. *Chemosphere* 93, 1309–1316. <https://doi.org/10.1016/j.chemosphere.2013.07.011>
- Aguedach, A., Brosillon, S., Morvan, J., Lhadi, E.K., 2008. Influence of ionic strength in the adsorption and during photocatalysis of reactive black 5 azo dye on TiO<sub>2</sub> coated on non woven paper with SiO<sub>2</sub> as a binder. *J. Hazard. Mater.* 150, 250–256. <https://doi.org/10.1016/j.jhazmat.2007.04.086>
- Akyol, A., Bayramoglu, M., 2008. The degradation of an azo dye in a batch slurry photocatalytic reactor. *Chem. Eng. Process. Process Intensif.* 47, 2150–2156. <https://doi.org/10.1016/j.cep.2007.11.002>
- Alaton, I.A., Balcioğlu, I.A., 2002. The effect of pre-ozonation on the H<sub>2</sub>O<sub>2</sub>/UV-C treatment of raw and biologically pre-treated textile industry wastewater. *Water Sci. Technol.* 45, 297–304.
- Aleboyeh, A., Olya, M.E., Aleboyeh, H., 2008. Electrical energy determination for an azo dye decolorization and mineralization by UV/H<sub>2</sub>O<sub>2</sub> advanced oxidation process. *Chem. Eng. J.* 137, 518–524. <https://doi.org/10.1016/j.cej.2007.05.016>
- Aquino, J.M., Pereira, G.F., Rocha-Filho, R.C., Bocchi, N., Biaggio, S.R., 2011. Electrochemical degradation of a real textile effluent using boron-doped diamond or β-PbO<sub>2</sub> as anode. *J. Hazard. Mater.* 192, 1275–1282. <https://doi.org/10.1016/j.jhazmat.2011.06.039>
- Aquino, J.M., Rocha-Filho, R.C., Ruotolo, L.A.M., Bocchi, N., Biaggio, S.R., 2014. Electrochemical degradation of a real textile wastewater using β-PbO<sub>2</sub> and DSA® anodes. *Chem. Eng. J.* 251, 138–145. <https://doi.org/10.1016/j.cej.2014.04.032>
- Arcanjo, G.S., Mounteer, A.H., Bellato, C.R., Silva, L.M.M. da, Brant Dias, S.H., Silva, P.R. da, 2018. Heterogeneous photocatalysis using TiO<sub>2</sub> modified with hydrotalcite and iron oxide under UV–visible irradiation for color and toxicity reduction in secondary textile mill effluent. *J. Environ. Manage.* 211, 154–163. <https://doi.org/10.1016/j.jenvman.2018.01.033>
- Arslan, I., Akmehmet, I., Bahnemann, D.W., 2002. Advanced oxidation of a reactive dye bath effluent: comparison of O<sub>3</sub>, H<sub>2</sub>O<sub>2</sub>/UV-C and TiO<sub>2</sub>/UV-A processes. *Water Res.* 36, 1143–1154.
- Arslan, I., Balcioğlu, I.A., Tuhkanen, T., 1999. Advanced oxidation of synthetic dyehouse effluent by O<sub>3</sub>, H<sub>2</sub>O<sub>2</sub>/O<sub>3</sub> and H<sub>2</sub>O<sub>2</sub>/UV processes. *Environ. Technol.* 20, 921–931. <https://doi.org/10.1080/09593332008616887>
- Arslan, I., Balcioğlu, I.A., Tuhkanen, T., 2000. Treatability of simulated reactive dye-bath wastewater by photochemical and non-photochemical advanced oxidation processes. *J. Environ. Sci. Heal.* 35, 775–793. <https://doi.org/10.1080/10934520009377002>
- Azbar, N., Yonar, T., Kestioglu, K., 2004. Comparison of various advanced oxidation processes and chemical treatment methods for COD and color removal from a polyester and acetate fiber dyeing effluent. *Chemosphere.* <https://doi.org/10.1016/j.chemosphere.2003.10.046>
- Baban, A., Yediler, A., Lienert, D., Kemerdere, N., Kettrup, A., 2003. Ozonation of high strength segregated effluents from a woollen textile dyeing and finishing plant. *Dye. Pigment.* 58, 93–98. [https://doi.org/10.1016/S0143-7208\(03\)00047-0](https://doi.org/10.1016/S0143-7208(03)00047-0)

- Badawy, M.I., Ali, M.E.M., 2006. Fenton's peroxidation and coagulation processes for the treatment of combined industrial and domestic wastewater. *J. Hazard. Mater.* 136, 961–966. <https://doi.org/10.1016/j.jhazmat.2006.01.042>
- Baddouh, A., Bessegato, G.G., Rguiti, M.M., El Ibrahim, B., Bazzi, L., Hilali, M., Zanon, M.V.B., 2018. Electrochemical decolorization of Rhodamine B dye: Influence of anode material, chloride concentration and current density. *J. Environ. Chem. Eng.* 6, 2041–2047. <https://doi.org/10.1016/j.jece.2018.03.007>
- Barakat, M.A., 2010. Adsorption and photodegradation of Procion yellow H-EXL dye in textile wastewater over TiO<sub>2</sub> suspension. *Fourteenth Int. Water Technol. Conf.* 14, 445–458.
- Basha, C.A., Sendhil, J., Selvakumar, K. V., Muniswaran, P.K.A., Lee, C.W., 2012. Electrochemical degradation of textile dyeing industry effluent in batch and flow reactor systems. *Desalination* 285, 188–197. <https://doi.org/10.1016/j.desal.2011.09.054>
- Basturk, E., Karatas, M., 2015. Decolorization of anthraquinone dye Reactive Blue 181 solution by UV/H<sub>2</sub>O<sub>2</sub> process. *J. Photochem. Photobiol. A Chem.* <https://doi.org/10.1016/j.jphotochem.2014.11.003>
- Behnajady, M.A., Eskandarloo, H., Modirshahla, N., Shokri, M., 2011. Influence of the chemical structure of organic pollutants on photocatalytic activity of TiO<sub>2</sub> nanoparticles: Kinetic analysis and evaluation of electrical energy per order (EEO). *Dig. J. Nanomater. Biostructures* 6, 1887–1895.
- Behnajady, M.A., Modirshahla, N., 2006. Evaluation of electrical energy per order (EEO) with kinetic modeling on photooxidative degradation of C. I. Acid orange 7 in a tubular continuous-flow photoreactor. *Ind. Eng. Chem. Res.* 45, 553–557. <https://doi.org/10.1021/ie050111c>
- Behnajady, M.A., Vahid, B., 2016. Development of an empirical kinetics model for sono-degradation of Malachite Green: evaluation of electrical energy per order. *Jundishapur J. Heal. Sci.* 8, 36–40. <https://doi.org/10.17795/jjhs-33590>
- Bensalah, N., Alfaro, M.A.Q., Martínez-Huitle, C.A., 2009. Electrochemical treatment of synthetic wastewaters containing Alphazurine A dye. *Chem. Eng. J.* 149, 348–352. <https://doi.org/10.1016/j.cej.2008.11.031>
- Buthiyappan, A., Abdul Raman, A.A., 2019. Energy intensified integrated advanced oxidation technology for the treatment of recalcitrant industrial wastewater. *J. Clean. Prod.* 206, 1025–1040. <https://doi.org/10.1016/j.jclepro.2018.09.234>
- Cardoso, J.C., Bessegato, G.G., Boldrin Zanon, M.V., 2016. Efficiency comparison of ozonation, photolysis, photocatalysis and photoelectrocatalysis methods in real textile wastewater decolorization. *Water Res.* 98, 39–46. <https://doi.org/10.1016/j.watres.2016.04.004>
- Chakrabarti, S., Dutta, B.K., 2004. Photocatalytic degradation of model textile dyes in wastewater using ZnO as semiconductor catalyst. *J. Hazard. Mater.* 112, 269–278. <https://doi.org/10.1016/j.jhazmat.2004.05.013>
- Chang, M.C., Shu, H.Y., Yu, H.H., 2006. An integrated technique using zero-valent iron and UV/H<sub>2</sub>O<sub>2</sub> sequential process for complete decolorization and mineralization of C.I. Acid Black 24 wastewater. *J. Hazard. Mater.* <https://doi.org/10.1016/j.jhazmat.2006.05.088>
- Chatzisympson, E., Xekoukoulotakis, N.P., Coz, A., Kalogerakis, N., Mantzavinos, D., 2006. Electrochemical treatment of textile dyes and dyehouse effluents. *J. Hazard. Mater.* 137, 998–1007. <https://doi.org/10.1016/j.jhazmat.2006.03.032>
- Chen, Y., Yang, S., Wang, K., Lou, L., 2005. Role of primary active species and TiO<sub>2</sub> surface characteristic in UV-illuminated photodegradation of Acid Orange 7. *J. Photochem. Photobiol. A Chem.* 172, 47–54.

- <https://doi.org/10.1016/j.jphotochem.2004.11.006>
- Chiang, Y.J., Lin, C.C., 2013. Photocatalytic decolorization of methylene blue in aqueous solutions using coupled ZnO/SnO<sub>2</sub> photocatalysts. *Powder Technol.* 246, 137–143. <https://doi.org/10.1016/j.powtec.2013.04.033>
- Chu, L.B., Xing, X.H., Yu, A.F., Zhou, Y.N., Sun, X.L., Jurcik, B., 2007. Enhanced ozonation of simulated dyestuff wastewater by microbubbles. *Chemosphere* 68, 1854–1860. <https://doi.org/10.1016/j.chemosphere.2007.03.014>
- Daneshvar, N., Aleboyeh, A., Khataee, A.R., 2005. The evaluation of electrical energy per order (EEO) for photooxidative decolorization of four textile dye solutions by the kinetic model. *Chemosphere* 59, 761–767. <https://doi.org/10.1016/j.chemosphere.2004.11.012>
- Daneshvar, N., Behnajady, M.A., Mohammadi, M.K.A., Dorraji, M.S.S., 2008. UV/H<sub>2</sub>O<sub>2</sub> treatment of Rhodamine B in aqueous solution: Influence of operational parameters and kinetic modeling. *Desalination* 230, 16–26. <https://doi.org/10.1016/j.desal.2007.11.012>
- Daneshvar, N., Rasoulifard, M.H., Khataee, A.R., Hosseinzadeh, F., 2007. Removal of C.I. Acid Orange 7 from aqueous solution by UV irradiation in the presence of ZnO nanopowder. *J. Hazard. Mater.* 143, 95–101. <https://doi.org/10.1016/j.jhazmat.2006.08.072>
- Dede, O.T., Aksu, Z., Rehorek, A., 2019. Sonochemical Degradation of C.I. Reactive Orange 107. *Environ. Eng. Sci.* 36, 158–171. <https://doi.org/10.1089/ees.2018.0076>
- Destailhats, H., Colussi, A.J., Joseph, J.M., Hoffmann, M.R., 2000. Synergistic effects of sonolysis combined with ozonolysis for the oxidation of azobenzene and methyl orange. *J. Phys. Chem. A* 104, 8930–8935. <https://doi.org/10.1021/jp001415+>
- Durr-E-Shahwar, Yasar, A., Yousaf, S., 2012. Solar assisted photo fenton for cost effective degradation of textile effluents in comparison to AOPs. *Glob. Nest J.* 14, 477–486. <https://doi.org/10.30955/gnj.000804>
- Erol, F., Özbelge, T.A., 2008. Catalytic ozonation with non-polar bonded alumina phases for treatment of aqueous dye solutions in a semi-batch reactor. *Chem. Eng. J.* <https://doi.org/10.1016/j.cej.2007.07.100>
- Ertugay, N., Acar, F.N., 2017. Removal of COD and color from Direct Blue 71 azo dye wastewater by Fenton's oxidation: Kinetic study. *Arab. J. Chem.* <https://doi.org/10.1016/j.arabjc.2013.02.009>
- Faouzi Elahmadi, M., Bensalah, N., Gadri, A., 2009. Treatment of aqueous wastes contaminated with Congo Red dye by electrochemical oxidation and ozonation processes. *J. Hazard. Mater.* 168, 1163–1169. <https://doi.org/10.1016/j.jhazmat.2009.02.139>
- Ferreira, L.C., Lucas, M.S., Fernandes, J.R., Tavares, P.B., 2016. Photocatalytic oxidation of Reactive Black 5 with UV-A LEDs. *J. Environ. Chem. Eng.* 4, 109–114. <https://doi.org/10.1016/j.jece.2015.10.042>
- Gao, M., Zeng, Z., Sun, B., Zou, H., Chen, J., Shao, L., 2012. Ozonation of azo dye Acid Red 14 in a microporous tube-in-tube microchannel reactor: Decolorization and mechanism. *Chemosphere* 89, 190–197. <https://doi.org/10.1016/j.chemosphere.2012.05.083>
- Georgiou, D., Melidis, P., Aivasidis, A., Gimouhopoulos, K., 2002. Degradation of azo-reactive dyes by ultraviolet radiation in the presence of hydrogen peroxide. *Dye. Pigment.* [https://doi.org/10.1016/S0143-7208\(01\)00078-X](https://doi.org/10.1016/S0143-7208(01)00078-X)
- Gül, Ş., Özcan, Ö., Erbatur, O., 2007. Ozonation of C.I. Reactive Red 194 and C.I. Reactive Yellow 145 in aqueous solution in the presence of granular activated carbon. *Dye. Pigment.* 75, 426–431. <https://doi.org/10.1016/j.dyepig.2006.06.018>
- Hamad, H., Bassyouni, D., El-Ashtoukhy, E.S., Amin, N., Abd El-Latif, M., 2018. Electrocatalytic degradation and minimization of specific energy consumption of

- synthetic azo dye from wastewater by anodic oxidation process with an emphasis on enhancing economic efficiency and reaction mechanism. *Ecotoxicol. Environ. Saf.* 148, 501–512. <https://doi.org/10.1016/j.ecoenv.2017.10.061>
- Hayat, H., Mahmood, Q., Pervez, A., Bhatti, Z.A., Baig, S.A., 2015. Comparative decolorization of dyes in textile wastewater using biological and chemical treatment. *Sep. Purif. Technol.* 154, 149–153. <https://doi.org/10.1016/j.seppur.2015.09.025>
- He, Z., Song, S., Xia, M., Qiu, J., Ying, H., Lü, B., Jiang, Y., Chen, J., 2007. Mineralization of C.I. Reactive Yellow 84 in aqueous solution by sonolytic ozonation. *Chemosphere* 69, 191–199. <https://doi.org/10.1016/j.chemosphere.2007.04.045>
- Ince, N.H., Gönenç, D.T., 1997. Treatability of a textile azo dye by UV/H<sub>2</sub>O<sub>2</sub>. *Environ. Technol.* 18, 179–185. <https://doi.org/10.1080/09593330.1997.9618484>
- Ince, N.H., Tezcanlı, G., 2001. Reactive dyestuff degradation by combined sonolysis and ozonation. *Dye. Pigment.* 49, 145–153. [https://doi.org/10.1016/S0143-7208\(01\)00019-5](https://doi.org/10.1016/S0143-7208(01)00019-5)
- Jogani, R., Bhervia, H., Kapoor, S., Singh, A., 2017. Optimization of Different Variables Used in Fenton Reagent Process for Removal of Direct Red 80 Dye. *Int. J. Adv. Agric. Environ. Eng.* 4, 230.
- Karami, M.A., Amin, M.M., Nourmoradi, H., Sadani, M., Teimouri, F., Bina, B., 2016. Degradation of reactive red 198 from aqueous solutions by advanced oxidation process. *Int. J. Environ. Health Eng.* 5, 1–7.
- Kasiri, M.B., Khataee, A.R., 2012. Removal of organic dyes by UV/H<sub>2</sub>O<sub>2</sub> process: Modelling and optimization. *Environ. Technol.* 33, 1417–1425. <https://doi.org/10.1080/09593330.2011.630425>
- Kasiri, M.B., Khataee, A.R., 2011. Photooxidative decolorization of two organic dyes with different chemical structures by UV/H<sub>2</sub>O<sub>2</sub> process: Experimental design. *Desalination* 270, 151–159. <https://doi.org/10.1016/j.desal.2010.11.039>
- Khadhraoui, M., Trabelsi, H., Ksibi, M., Bouguerra, S., Elleuch, B., 2009. Discoloration and detoxification of a Congo red dye solution by means of ozone treatment for a possible water reuse. *J. Hazard. Mater.* <https://doi.org/10.1016/j.jhazmat.2008.04.060>
- Khataee, A., Vahid, B., Behjati, B., Safarpour, M., Joo, S.W., 2014. Kinetic modeling of a triarylmethane dye decolorization by photoelectro-Fenton process in a recirculating system: Nonlinear regression analysis. *Chem. Eng. Res. Des.* 92, 362–367. <https://doi.org/10.1016/j.cherd.2013.07.019>
- Khataee, A.R., 2009. Photocatalytic removal of C.I. Basic Red 46 on immobilized TiO<sub>2</sub> nanoparticles: Artificial neural network modelling. *Environ. Technol.* 30, 1155–1168. <https://doi.org/10.1080/09593330903133911>
- Khataee, A.R., Pons, M.N., Zahraa, O., 2009. Photocatalytic degradation of three azo dyes using immobilized TiO<sub>2</sub> nanoparticles on glass plates activated by UV light irradiation: Influence of dye molecular structure. *J. Hazard. Mater.* 168, 451–457. <https://doi.org/10.1016/j.jhazmat.2009.02.052>
- Krishnakumar, B., Swaminathan, M., 2011. Influence of operational parameters on photocatalytic degradation of a genotoxic azo dye Acid Violet 7 in aqueous ZnO suspensions. *Spectrochim. Acta - Part A Mol. Biomol. Spectrosc.* 81, 739–744. <https://doi.org/10.1016/j.saa.2011.07.019>
- Ling, Y., Hu, J., Qian, Z., Zhu, L., Chen, X., 2016. Continuous treatment of biologically treated textile effluent using a multi-cell electrochemical reactor. *Chem. Eng. J.* 286, 571–577. <https://doi.org/10.1016/j.cej.2015.10.104>
- Liu, Haining, Li, G., Qu, J., Liu, Huijuan, 2007. Degradation of azo dye Acid Orange 7 in water by Fe<sup>0</sup>/granular activated carbon system in the presence of ultrasound. *J. Hazard. Mater.* 144, 180–186. <https://doi.org/10.1016/j.jhazmat.2006.10.009>
- Lizama, C., Freer, J., Baeza, J., Mansilla, H.D., 2002. Optimized photodegradation of

- Reactive Blue 19 on TiO<sub>2</sub> and ZnO suspensions. *Catal. Today* 76, 235–246.  
[https://doi.org/10.1016/S0920-5861\(02\)00222-5](https://doi.org/10.1016/S0920-5861(02)00222-5)
- Lizama, C., Yeber, M.C., Freer, J., Baeza, J., Mansilla, H.D., 2001. Reactive dyes decolouration by TiO<sub>2</sub> photo-assisted catalysis. *Water Sci. Technol.* 44, 197–203.  
<https://doi.org/10.2166/wst.2001.0285>
- Ma, C.Y., Xu, J.Y., Liu, X.J., 2006. Decomposition of an azo dye in aqueous solution by combination of ultrasound and visible light. *Ultrasonics* 44, 375–378.  
<https://doi.org/10.1016/j.ultras.2006.05.164>
- Maezawa, A., Nakadoi, H., Suzuki, K., Furusawa, T., Suzuki, Y., Uchida, S., 2007. Treatment of dye wastewater by using photo-catalytic oxidation with sonication. *Ultrason. Sonochem.* 14, 615–620. <https://doi.org/10.1016/j.ultsonch.2006.11.002>
- Mahamuni, N.N., Adewuyi, Y.G., 2010. Advanced oxidation processes (AOPs) involving ultrasound for waste water treatment: A review with emphasis on cost estimation. *Ultrason. Sonochem.* 17, 990–1003. <https://doi.org/10.1016/j.ultsonch.2009.09.005>
- Mahmoud, G.E.A., Ismail, L.F.M., 2011. Factors Affecting the Kinetic Parameters Related to the Degradation of Direct Yellow 50 by Fenton and Photo-Fenton Processes Factors Affecting the Kinetic Parameters Related to the Degradation of Direct Yellow 50 by Fenton and Photo-Fenton Processes. *J. Basic Appl. Chem.* 1, 70–79.
- Malik, S.N., Ghosh, P.C., Vaidya, A.N., Mudliar, S.N., 2018. Catalytic ozone pretreatment of complex textile effluent using Fe<sup>2+</sup> and zero valent iron nanoparticles. *J. Hazard. Mater.* 357, 363–375. <https://doi.org/10.1016/j.jhazmat.2018.05.070>
- Malpass, G.R.P., Miwa, D.W., Machado, S.A.S., Motheo, A.J., 2008. Decolourisation of real textile waste using electrochemical techniques: Effect of electrode composition. *J. Hazard. Mater.* 156, 170–177. <https://doi.org/10.1016/j.jhazmat.2007.12.017>
- Malpass, G.R.P., Miwa, D.W., Mortari, D.A., Machado, S.A.S., Motheo, A.J., 2007. Decolorisation of real textile waste using electrochemical techniques: Effect of the chloride concentration. *Water Res.* 41, 2969–2977.  
<https://doi.org/10.1016/j.watres.2007.02.054>
- Manikandan, P., Palanisamy, P.N., Baskar, R., Sakthisharmila, P., 2017. Influence of chemical structure of Reactive Blue (diazo), Direct Red (diazo) and Acid Violet (triaryl alkane) dyes on the decolorization efficiency by photo assisted chemical oxidation process (PACO). *J. Eng. Technol. Res.* 5, 1–14.
- Martínez-Huitle, C.A., Dos Santos, E.V., De Araújo, D.M., Panizza, M., 2012. Applicability of diamond electrode/anode to the electrochemical treatment of a real textile effluent. *J. Electroanal. Chem.* 674, 103–107. <https://doi.org/10.1016/j.jelechem.2012.02.005>
- Modirshahla, N., Behnajady, M.A., Rahbarfam, R., Hassani, A., 2012. Effects of Operational Parameters on Decolorization of C. I. Acid Red 88 by UV/H<sub>2</sub>O<sub>2</sub> Process: Evaluation of Electrical Energy Consumption. *Clean - Soil, Air, Water* 40, 298–302.  
<https://doi.org/10.1002/clen.201000574>
- Mohagheghian, A., Karimi, S.A., Yang, J.K., Shirzad-Siboni, M., 2015. Photocatalytic degradation of a textile dye by illuminated tungsten oxide nanopowder. *J. Adv. Oxid. Technol.* 18, 61–68. <https://doi.org/10.1515/jaots-2015-0108>
- Muthukumar, M., Sargunamani, D., Selvakumar, N., Venkata Rao, J., 2004. Optimisation of ozone treatment for colour and COD removal of acid dye effluent using central composite design experiment. *Dye. Pigment.* 63, 127–134.  
<https://doi.org/10.1016/j.dyepig.2004.02.003>
- Nakamura, K.C., Guimarães, L.S., Magdalena, A.G., Angelo, A.C.D., De Andrade, A.R., Garcia-Segura, S., Pipi, A.R.F., 2019. Electrochemically-driven mineralization of Reactive Blue 4 cotton dye: On the role of in situ generated oxidants. *J. Electroanal. Chem.* 840, 415–422. <https://doi.org/10.1016/j.jelechem.2019.04.016>

- Natarajan, K., Natarajan, T.S., Bajaj, H.C., Tayade, R.J., 2011. Photocatalytic reactor based on UV-LED/TiO<sub>2</sub> coated quartz tube for degradation of dyes. *Chem. Eng. J.* 178, 40–49. <https://doi.org/10.1016/j.cej.2011.10.007>
- Olmez-Hanci, T., Imren, C., Kabdaslı, I., Tunay, O., Arslan-Alaton, I., 2011. Application of the UV-C photo-assisted peroxymonosulfate oxidation for the mineralization of dimethyl phthalate in aqueous solutions. *Photochem. Photobiol. Sci.* 10, 408–413. <https://doi.org/10.1039/c0pp00158a>
- Orts, F., del Río, A.I., Molina, J., Bonastre, J., Cases, F., 2018. Electrochemical treatment of real textile wastewater: Trichromy Procion HEXL®. *J. Electroanal. Chem.* 808, 387–394. <https://doi.org/10.1016/j.jelechem.2017.06.051>
- Özcan, A., Oturan, M.A., Oturan, N., Şahin, Y., 2009. Removal of Acid Orange 7 from water by electrochemically generated Fenton's reagent. *J. Hazard. Mater.* 163, 1213–1220. <https://doi.org/10.1016/j.jhazmat.2008.07.088>
- Panizza, M., Cerisola, G., 2009. Electro-Fenton degradation of synthetic dyes. *Water Res.* 43, 339–344. <https://doi.org/10.1016/j.watres.2008.10.028>
- Patel, S.G., Yadav, N.R., Patel, S.K., 2013. Evaluation of Degradation Characteristics of Reactive Dyes by UV/Fenton, UV/Fenton/Activated Charcoal, and UV/Fenton/TiO<sub>2</sub> Processes: A Comparative Study. *Sep. Sci. Technol.* 48, 1788–1800. <https://doi.org/10.1080/01496395.2012.756035>
- Peralta-Hernández, J.M., Meas-Vong, Y., Rodríguez, F.J., Chapman, T.W., Maldonado, M.I., Godínez, L.A., 2008. Comparison of hydrogen peroxide-based processes for treating dye-containing wastewater: Decolorization and destruction of Orange II azo dye in dilute solution. *Dye. Pigment.* 76, 656–662. <https://doi.org/10.1016/j.dyepig.2007.01.001>
- Peternel, I.T., Koprivanac, N., Božić, A.M.L., Kušić, H.M., 2007. Comparative study of UV/TiO<sub>2</sub>, UV/ZnO and photo-Fenton processes for the organic reactive dye degradation in aqueous solution. *J. Hazard. Mater.* 148, 477–484. <https://doi.org/10.1016/j.jhazmat.2007.02.072>
- Quan, X., Luo, D., Wu, J., Li, R., Cheng, W., Ge, shuping, 2017. Ozonation of acid red 18 wastewater using O<sub>3</sub>/Ca(OH)<sub>2</sub> system in a micro bubble gas-liquid reactor. *J. Environ. Chem. Eng.* 5, 283–291. <https://doi.org/10.1016/j.jece.2016.12.007>
- Ramírez-Pereda, B., Álvarez-Gallegos, A.A., Silva-Martinez, S., Rangel-Peraza, J.G., Bustos-Terrones, Y.A., 2019. Evaluation of the simultaneous use of two compartments of an electrochemical reactor for the elimination of azo dyes. *J. Electroanal. Chem.* 855, 1–8. <https://doi.org/10.1016/j.jelechem.2019.113593>
- Rehman, F., Sayed, M., Khan, J.A., Shah, N.S., Khan, H.M., Dionysiou, D.D., 2018. Oxidative removal of brilliant green by UV/S<sub>2</sub>O<sub>8</sub><sup>2-</sup>, UV/HSO<sub>5</sub><sup>-</sup> and UV/H<sub>2</sub>O<sub>2</sub> processes in aqueous media: A comparative study. *J. Hazard. Mater.* 357, 506–514. <https://doi.org/10.1016/j.jhazmat.2018.06.012>
- Ruiz, E.J., Arias, C., Brillas, E., Hernández-Ramírez, A., Peralta-Hernández, J.M., 2011. Mineralization of Acid Yellow 36 azo dye by electro-Fenton and solar photoelectro-Fenton processes with a boron-doped diamond anode. *Chemosphere* 82, 495–501. <https://doi.org/10.1016/j.chemosphere.2010.11.013>
- Sadik, W.A., 2007. Effect of inorganic oxidants in photodecolourization of an azo dye. *J. Photochem. Photobiol. A Chem.* 191, 132–137. <https://doi.org/10.1016/j.jphotochem.2007.04.013>
- Sala, M., Gutiérrez-Bouzán, M.C., 2014. Electrochemical treatment of industrial wastewater and effluent reuse at laboratory and semi-industrial scale. *J. Clean. Prod.* 65, 458–464. <https://doi.org/10.1016/j.jclepro.2013.08.006>
- Salari, D., Daneshvar, N., Niaei, A., Aber, S., Rasoulifard, M.H., 2008. The photo-oxidative

- destruction of C.I. Basic Yellow 2 using UV/S<sub>2</sub>O<sub>8</sub><sup>2-</sup> process in an annular photoreactor. *J. Environ. Sci. Heal. Part A* 43, 657–663. <https://doi.org/10.1080/10934520801893774>
- Salari, D., Niaei, A., Aber, S., Rasoulifard, M.H., 2009. The photooxidative destruction of C.I. Basic Yellow 2 using UV/S<sub>2</sub>O<sub>8</sub><sup>2-</sup> process in a rectangular continuous photoreactor. *J. Hazard. Mater.* 166, 61–66. <https://doi.org/10.1016/j.jhazmat.2008.11.039>
- Sevimli, M.F., Sarikaya, H.Z., 2005. Effect of some operational parameters on the decolorization of textile effluents and dye solutions by ozonation. *Environ. Technol.* 26, 135–144. <https://doi.org/10.1080/09593332608618573>
- Solano, A.M.S., de Araújo, C.K.C., de Melo, J.V., Peralta-Hernandez, J.M., da Silva, D.V., Martínez-Huitle, C.A., 2013. Decontamination of real textile industrial effluent by strong oxidant species electrogenerated on diamond electrode: Viability and disadvantages of this electrochemical technology. *Appl. Catal. B Environ.* 130–131, 112–120. <https://doi.org/10.1016/j.apcatb.2012.10.023>
- Song, S., Xu, L., He, Z., Chen, J., Xiao, X., Yan, B., 2007a. Mechanism of the photocatalytic degradation of C.I. reactive black 5 at pH 12.0 using SrTiO<sub>3</sub>/CeO<sub>2</sub> as the catalyst. *Environ. Sci. Technol.* 41, 5846–5853. <https://doi.org/10.1021/es070224i>
- Song, S., Xu, L., He, Z., Ying, H., Chen, J., Xiao, X., Yan, B., 2008. Photocatalytic degradation of C.I. Direct Red 23 in aqueous solutions under UV irradiation using SrTiO<sub>3</sub>/CeO<sub>2</sub> composite as the catalyst. *J. Hazard. Mater.* 152, 1301–1308. <https://doi.org/10.1016/j.jhazmat.2007.08.004>
- Song, S., Ying, H., He, Z., Chen, J., 2007b. Mechanism of decolorization and degradation of CI Direct Red 23 by ozonation combined with sonolysis. *Chemosphere* 66, 1782–1788. <https://doi.org/10.1016/j.chemosphere.2006.07.090>
- Tavares, M.G., da Silva, L.V.A., Sales Solano, A.M., Tonholo, J., Martínez-Huitle, C.A., Zanta, C.L.P.S., 2012. Electrochemical oxidation of Methyl Red using Ti/Ru 0.3Ti 0.7O<sub>2</sub> and Ti/Pt anodes. *Chem. Eng. J.* 204–205, 141–150. <https://doi.org/10.1016/j.cej.2012.07.056>
- Tehrani-Bagha, A.R., Mahmoodi, N.M., Menger, F.M., 2010. Degradation of a persistent organic dye from colored textile wastewater by ozonation. *Desalination*. <https://doi.org/10.1016/j.desal.2010.05.004>
- Tezcanli-Güyer, G., Ince, N.H., 2004. Individual and combined effects of ultrasound, ozone and UV irradiation: A case study with textile dyes. *Ultrasonics* 42, 603–609. <https://doi.org/10.1016/j.ultras.2004.01.096>
- Tsantaki, E., Velegraki, T., Katsaounis, A., Mantzavinos, D., 2012. Anodic oxidation of textile dyehouse effluents on boron-doped diamond electrode. *J. Hazard. Mater.* 207–208, 91–96. <https://doi.org/10.1016/j.jhazmat.2011.03.107>
- Vahid, B., Khataee, A., 2013. Photoassisted electrochemical recirculation system with boron-doped diamond anode and carbon nanotubes containing cathode for degradation of a model azo dye. *Electrochim. Acta* 88, 614–620. <https://doi.org/10.1016/j.electacta.2012.10.069>
- Vlyssides, A.G., Papaioannou, D., Loizidou, M., Karlis, P.K., Zorpas, A.A., 2000. Testing an electrochemical method for treatment of textile dye wastewater. *Waste Manag.* 20, 569–574. [https://doi.org/10.1016/S0956-053X\(00\)00028-3](https://doi.org/10.1016/S0956-053X(00)00028-3)
- Wang, A., Guo, W., Hao, F., Yue, X., Leng, Y., 2014. Degradation of acid orange 7 in aqueous solution by zero-valent aluminum under ultrasonic irradiation. *Ultrason. Sonochem.* 21, 572–575. <https://doi.org/10.1016/j.ultsonch.2013.10.015>
- Wang, C.T., Chou, W.L., Kuo, Y.M., Chang, F.L., 2009. Paired removal of color and COD from textile dyeing wastewater by simultaneous anodic and indirect cathodic oxidation. *J. Hazard. Mater.* 169, 16–22. <https://doi.org/10.1016/j.jhazmat.2009.03.054>
- Wu, C.H., 2008. Effects of sonication on decolorization of C.I. Reactive Red 198 in UV/ZnO



- system. *J. Hazard. Mater.* 153, 1254–1261.  
<https://doi.org/10.1016/j.jhazmat.2007.09.086>
- Wu, C.H., Kuo, C.Y., Chang, C.L., 2008. Decolorization of C.I. Reactive Red 2 by catalytic ozonation processes. *J. Hazard. Mater.* 153, 1052–1058.  
<https://doi.org/10.1016/j.jhazmat.2007.09.058>
- Wu, C.H., Lai, C.H., Chung, W.Y., 2013. Electrical energy per order and photodegradation efficiency of advanced oxidation processes. *Appl. Mech. Mater.* 291–294, 764–767.  
<https://doi.org/10.4028/www.scientific.net/AMM.291-294.764>
- Wu, C.H., Ng, H.Y., 2008. Degradation of C.I. Reactive Red 2 (RR2) using ozone-based systems: Comparisons of decolorization efficiency and power consumption. *J. Hazard. Mater.* <https://doi.org/10.1016/j.jhazmat.2007.06.073>
- Wu, J., Doan, H., Upreti, S., 2008. Decolorization of aqueous textile reactive dye by ozone. *Chem. Eng. J.* 142, 156–160. <https://doi.org/10.1016/j.cej.2007.11.019>
- Yen, H.Y., 2016. Energy consumption of treating textile wastewater for in-factory reuse by H<sub>2</sub>O<sub>2</sub>/UV process. *Desalin. Water Treat.* 57, 10537–10545.  
<https://doi.org/10.1080/19443994.2015.1039599>
- Yonar, T., Yonar, G.K., Kestioglu, K., Azbar, N., 2005. Decolorisation of textile effluent using homogeneous photochemical oxidation processes. *Color. Technol.* 121, 258–264.  
<https://doi.org/10.1111/j.1478-4408.2005.tb00283.x>
- Yu, F., Zhou, M., Yu, X., 2015. Cost-effective electro-Fenton using modified graphite felt that dramatically enhanced on H<sub>2</sub>O<sub>2</sub> electro-generation without external aeration. *Electrochim. Acta* 163, 182–189. <https://doi.org/10.1016/j.electacta.2015.02.166>
- Zhang, Q., Li, C., Li, T., 2013. Rapid photocatalytic decolorization of methylene blue using high photon flux UV/TiO<sub>2</sub>/H<sub>2</sub>O<sub>2</sub> process. *Chem. Eng. J.* 217, 407–413.  
<https://doi.org/10.1016/j.cej.2012.11.106>
- Zhang, X., Dong, W., Yang, W., 2013. Decolorization efficiency and kinetics of typical reactive azo dye RR2 in the homogeneous Fe(II) catalyzed ozonation process. *Chem. Eng. J.* 233, 14–23. <https://doi.org/10.1016/j.cej.2013.07.098>
